# Supplementary material for: Assessment of genetic diversity and yield performance in Jordanian barley (Hordeum vulgare L.) landraces grown under Rainfed conditions
Source: PubMed Central journal article supplement (PMC5668982; doi:10.1186/s12870-017-1140-1), 2017-11-02

**MILM**

AL

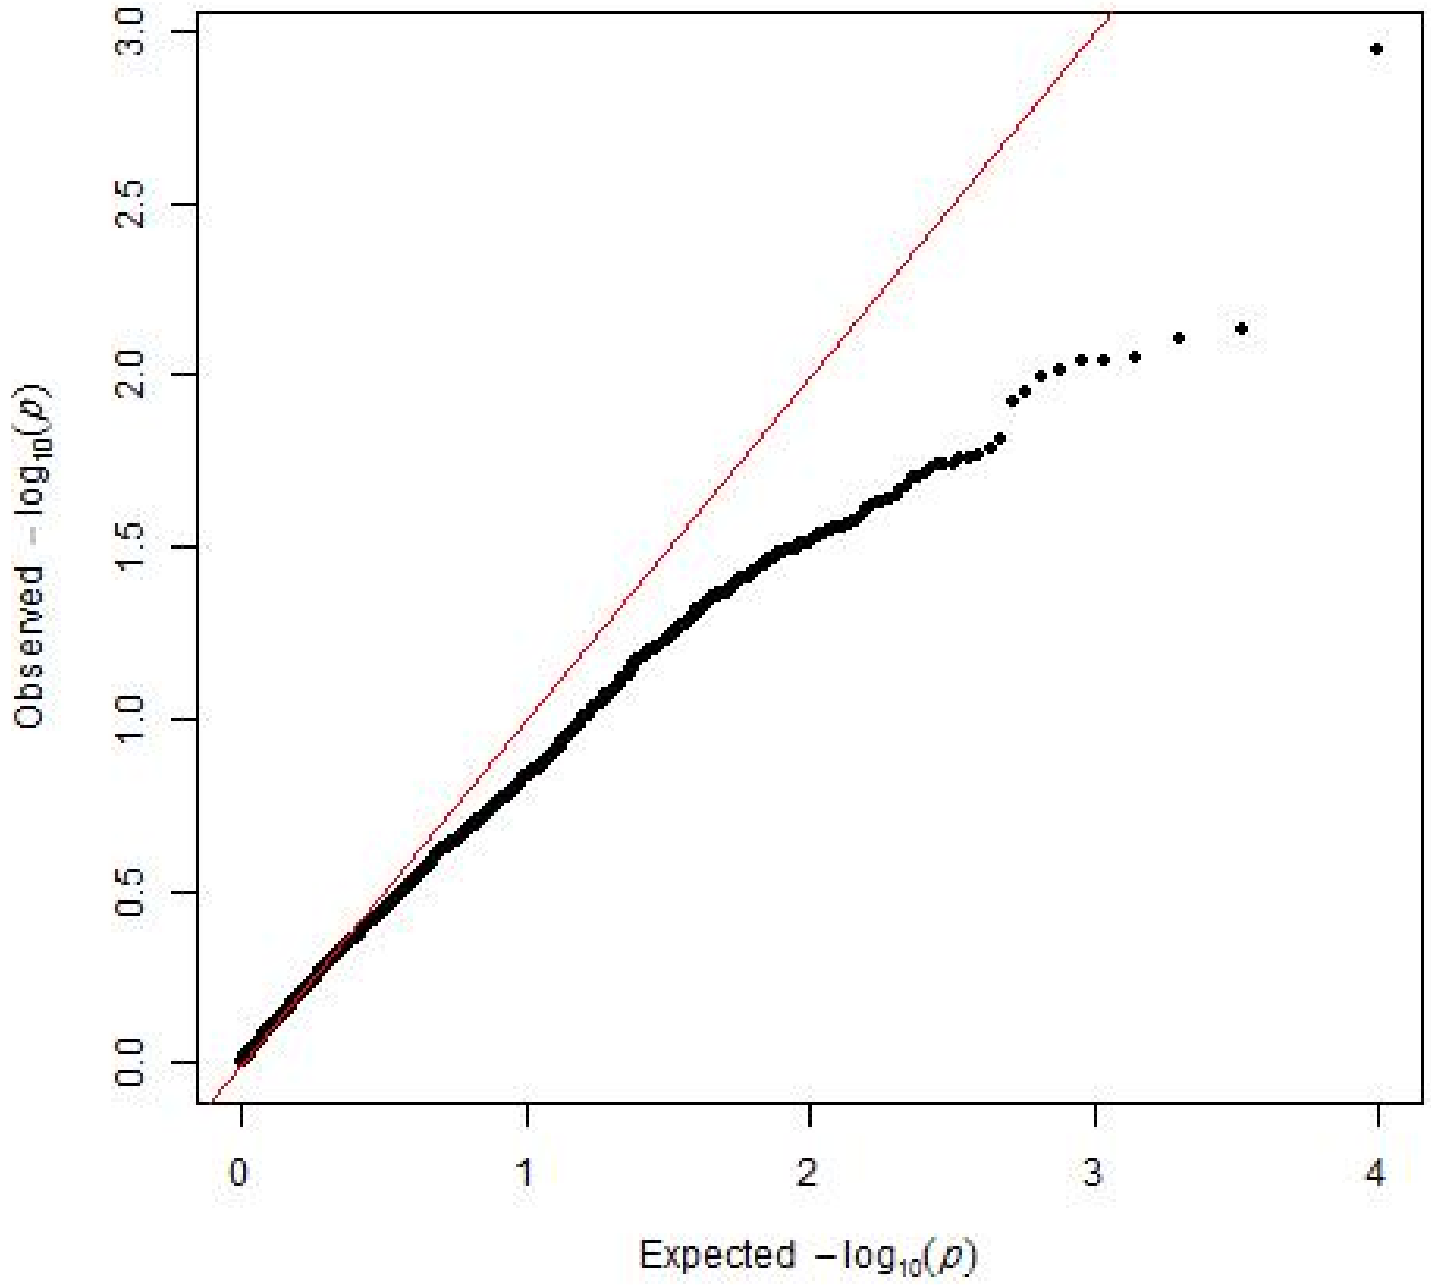

BY

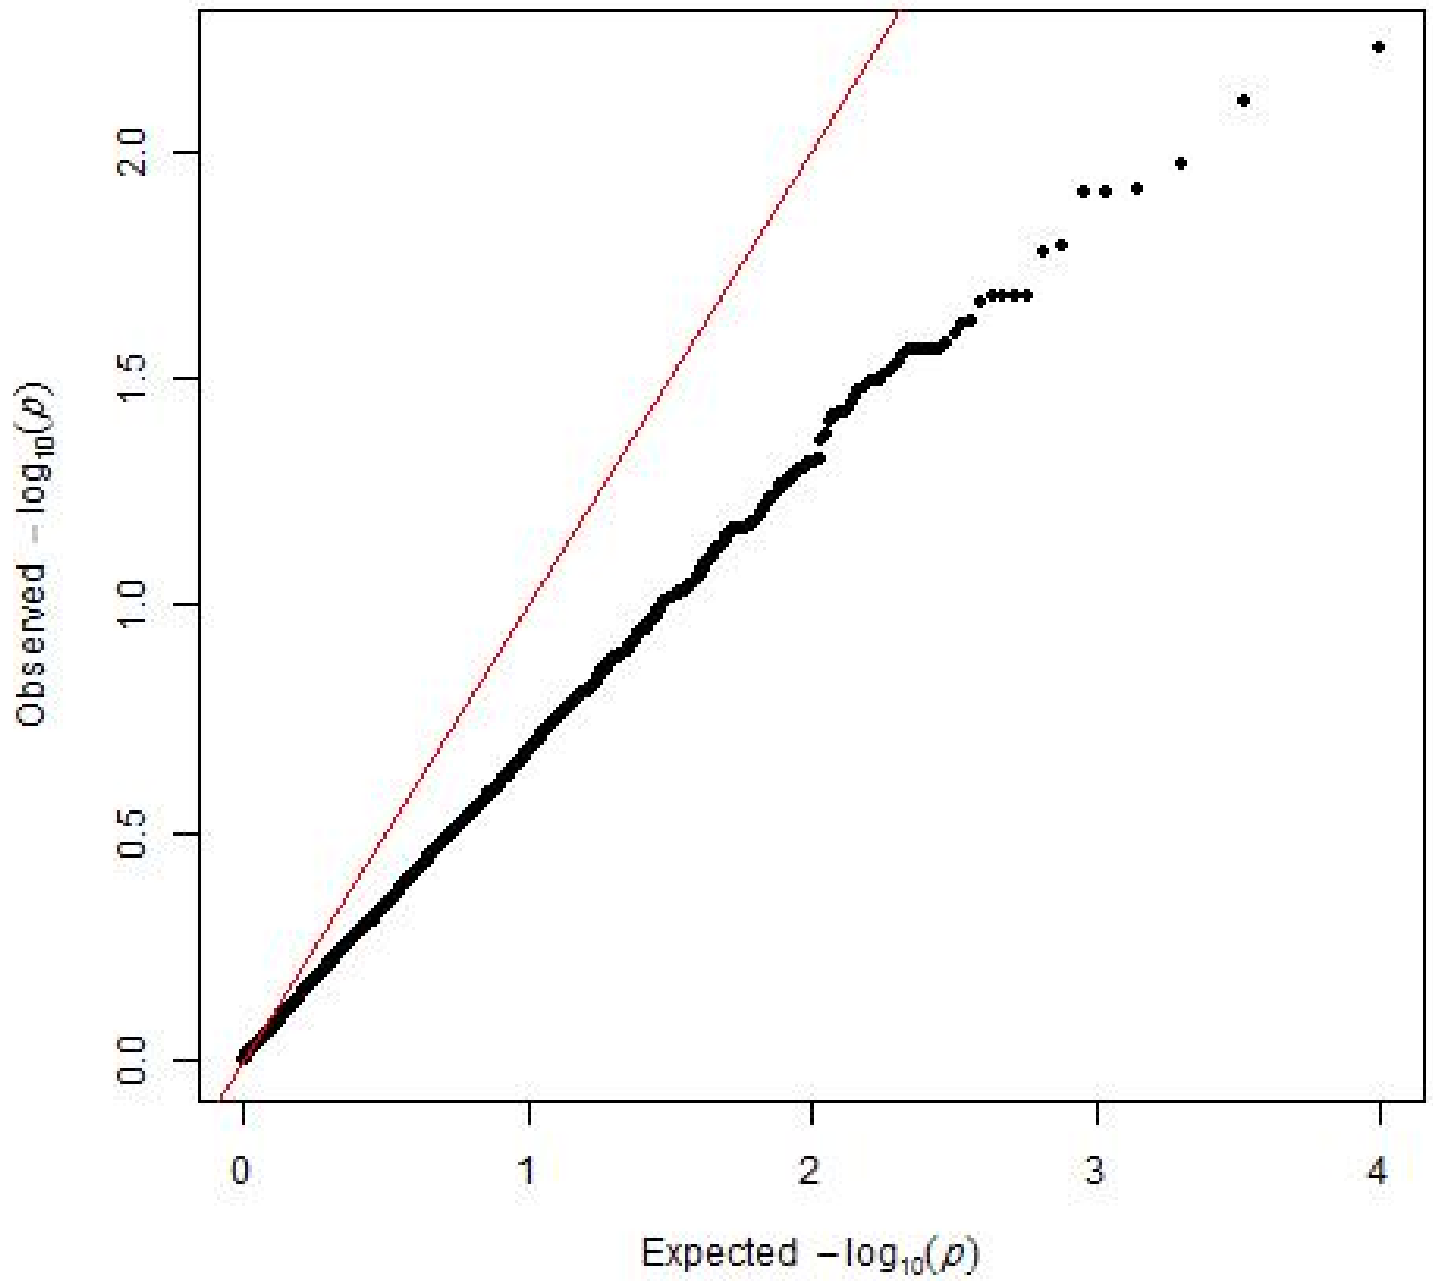

GY

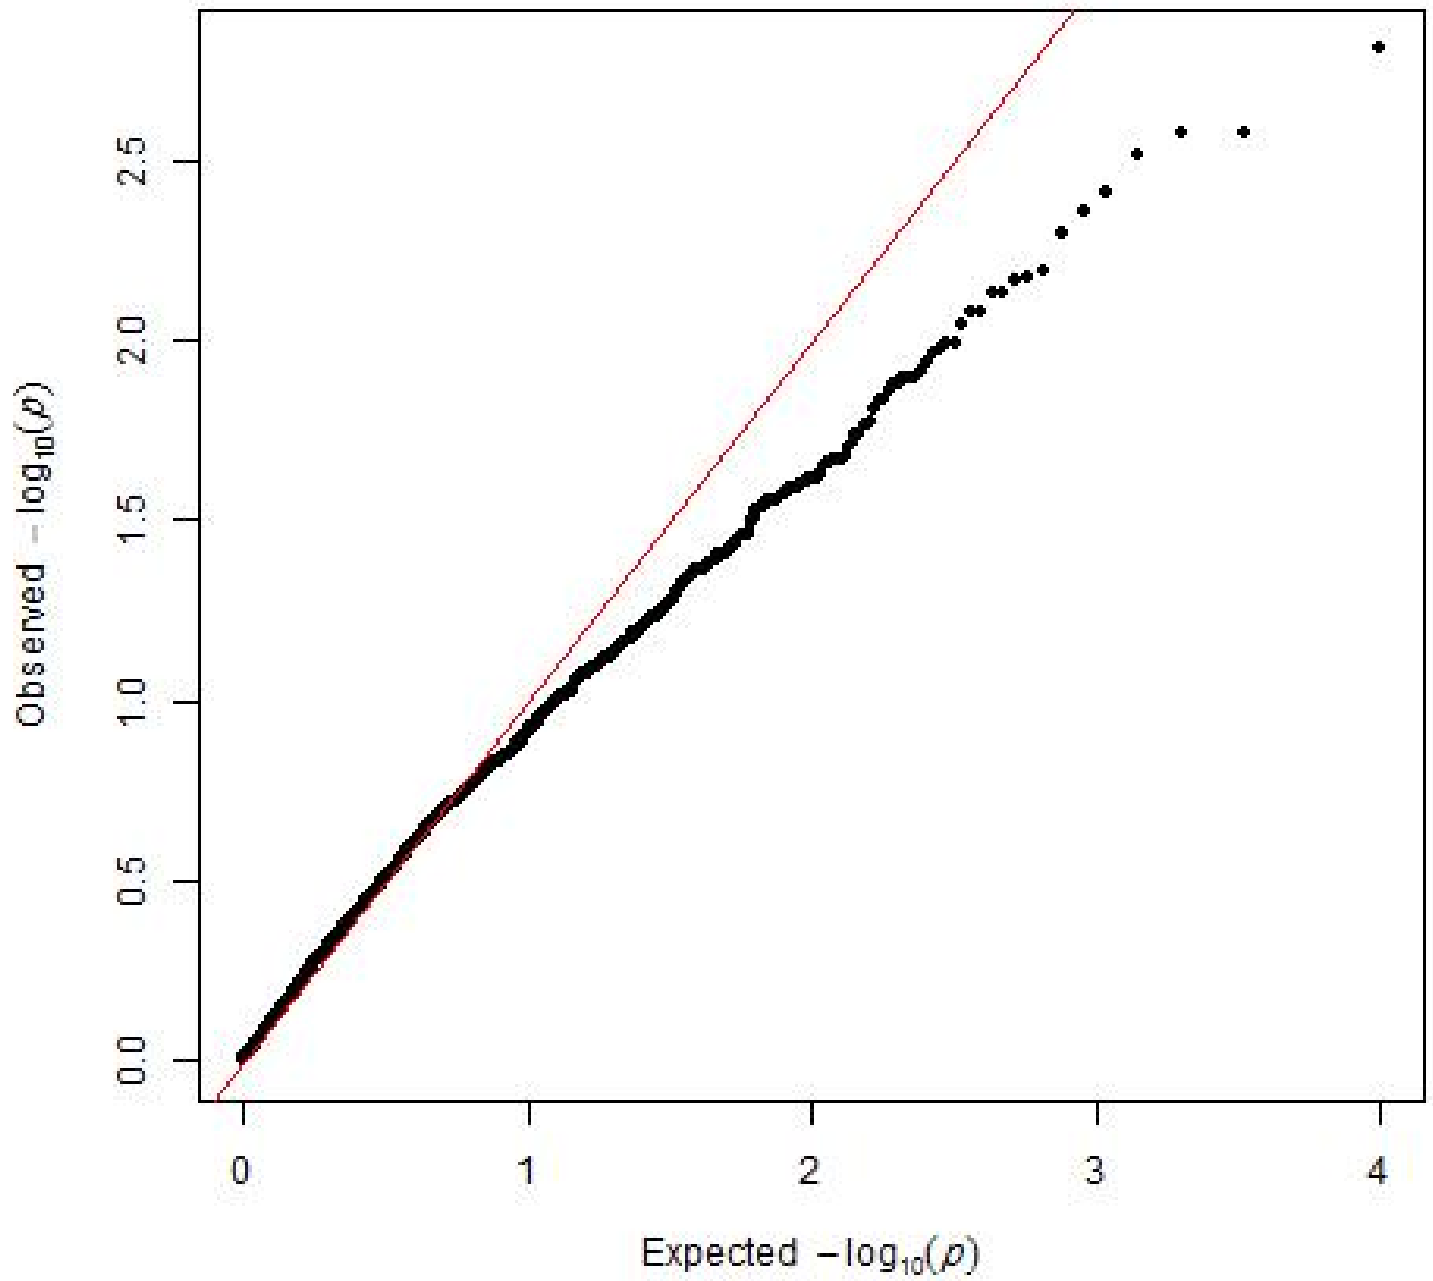

HI

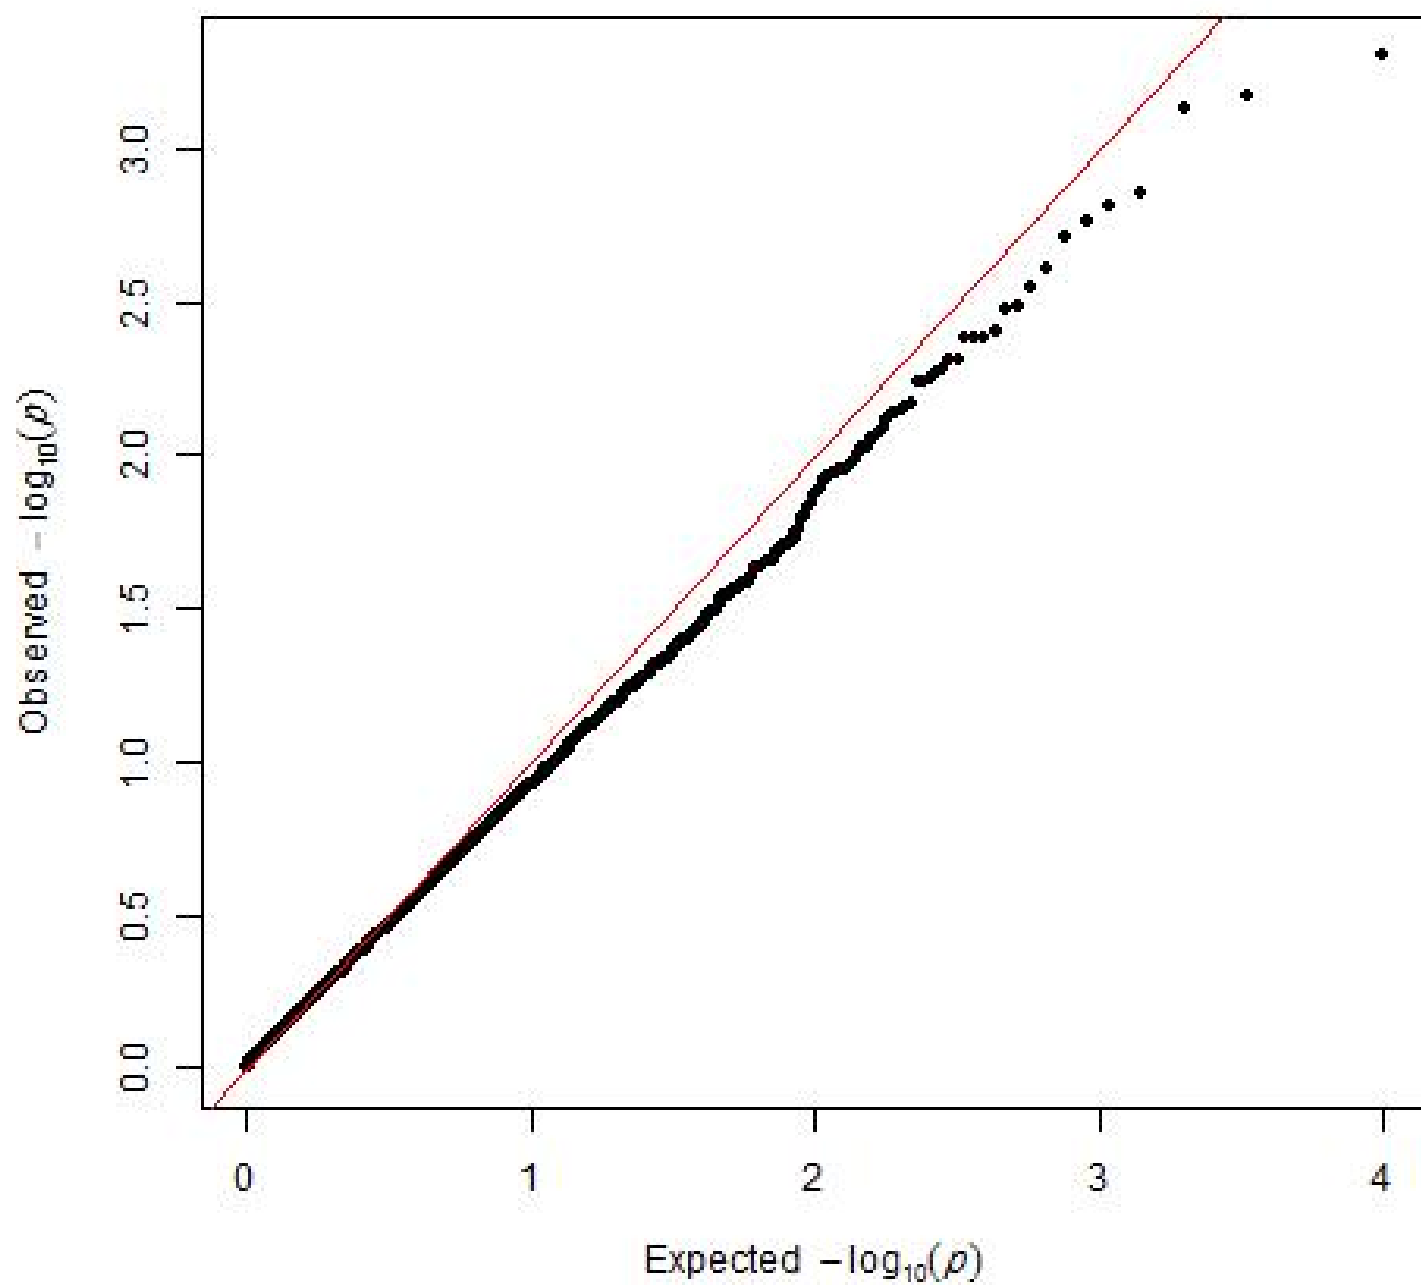

# K-S

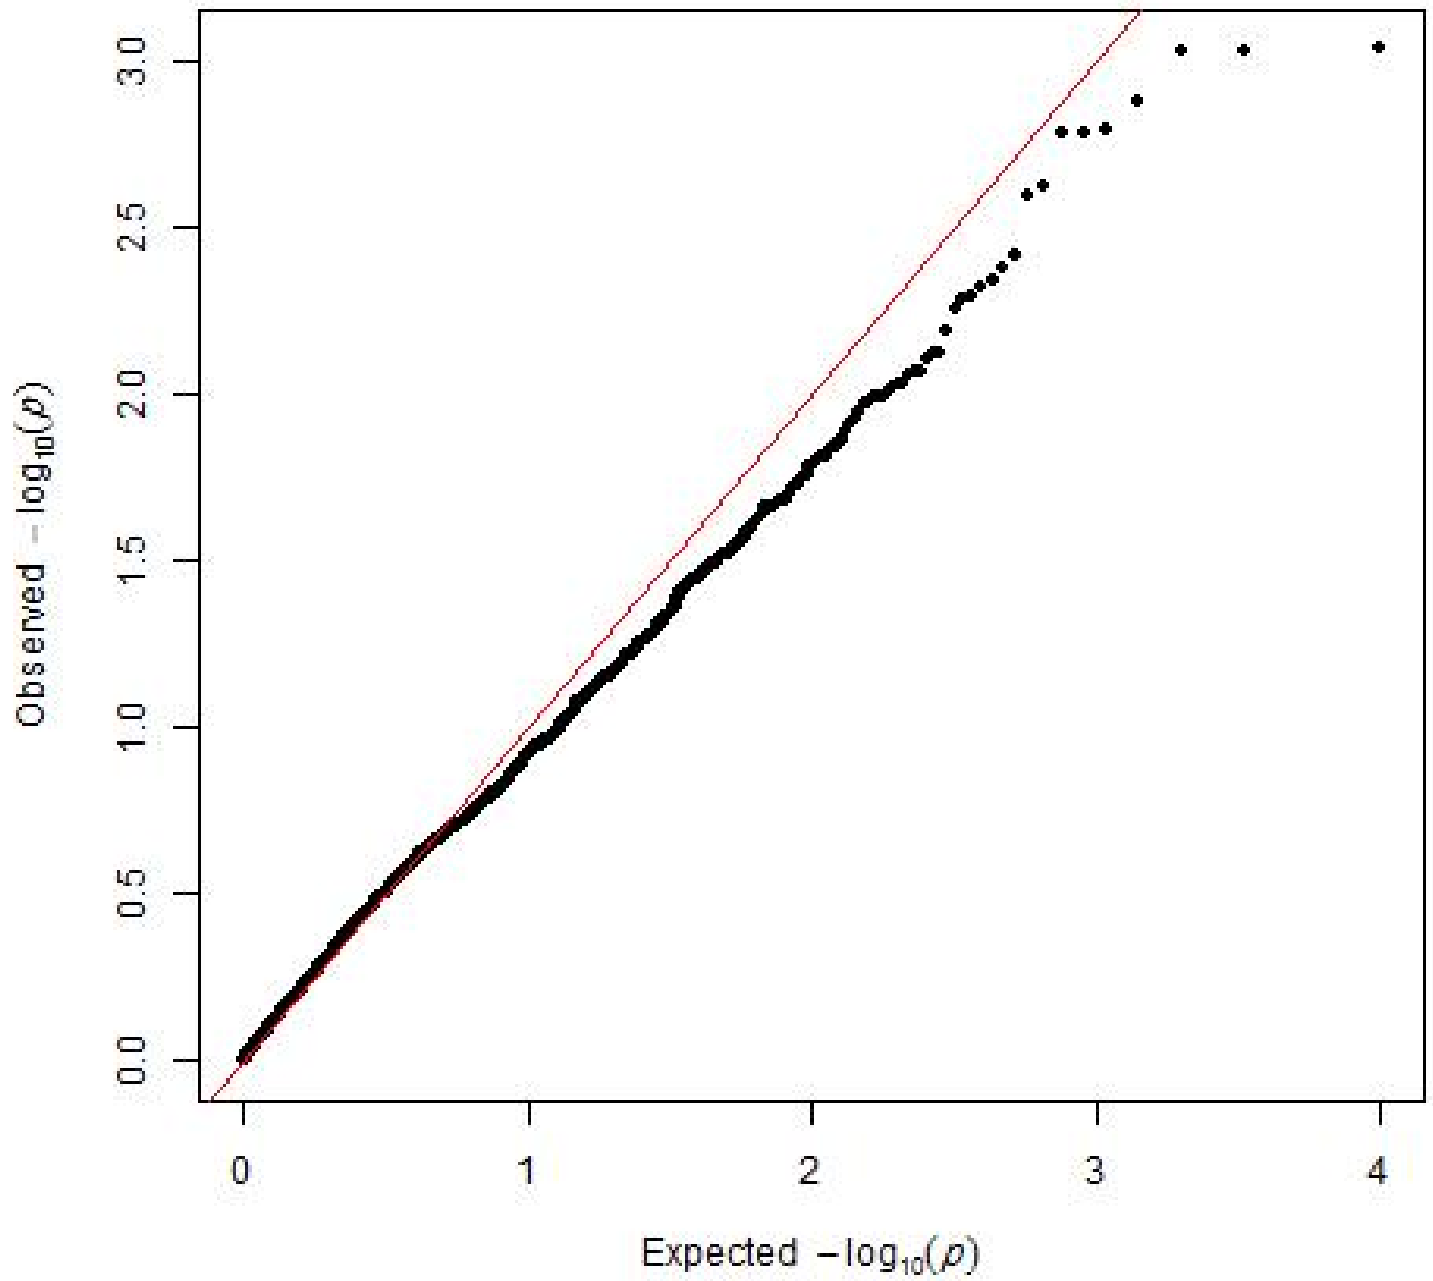

# PEX

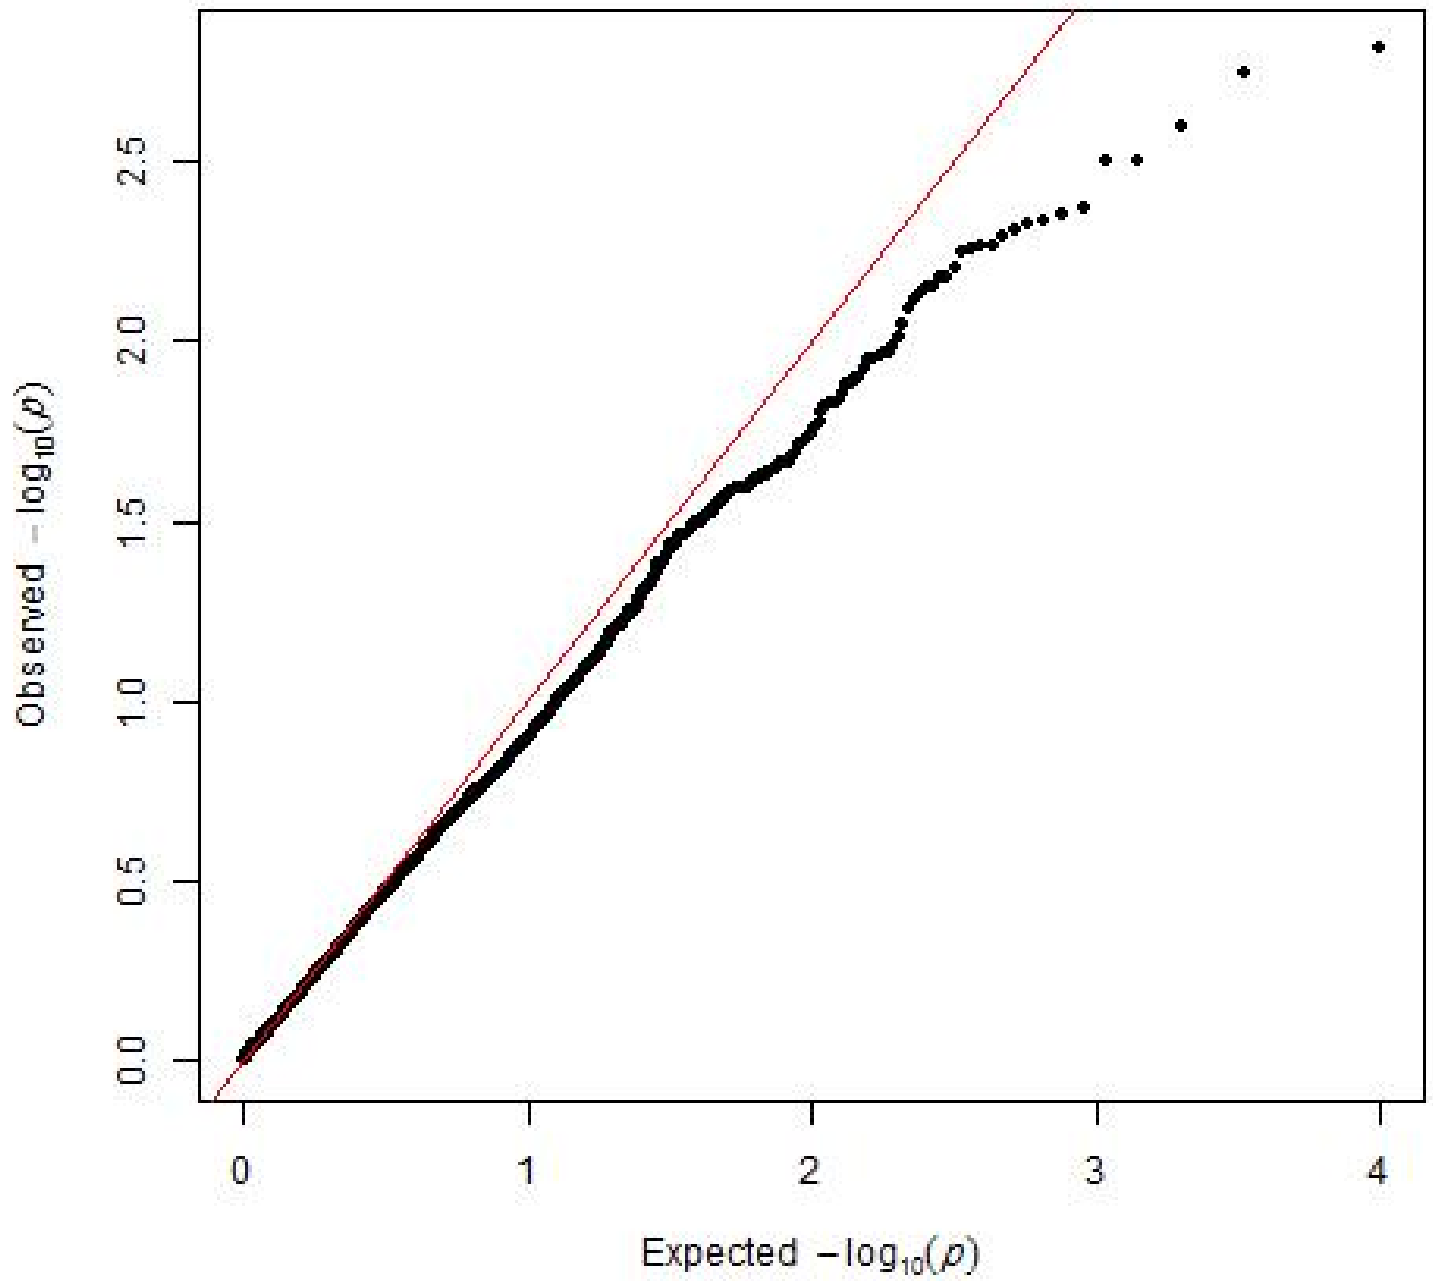

PH

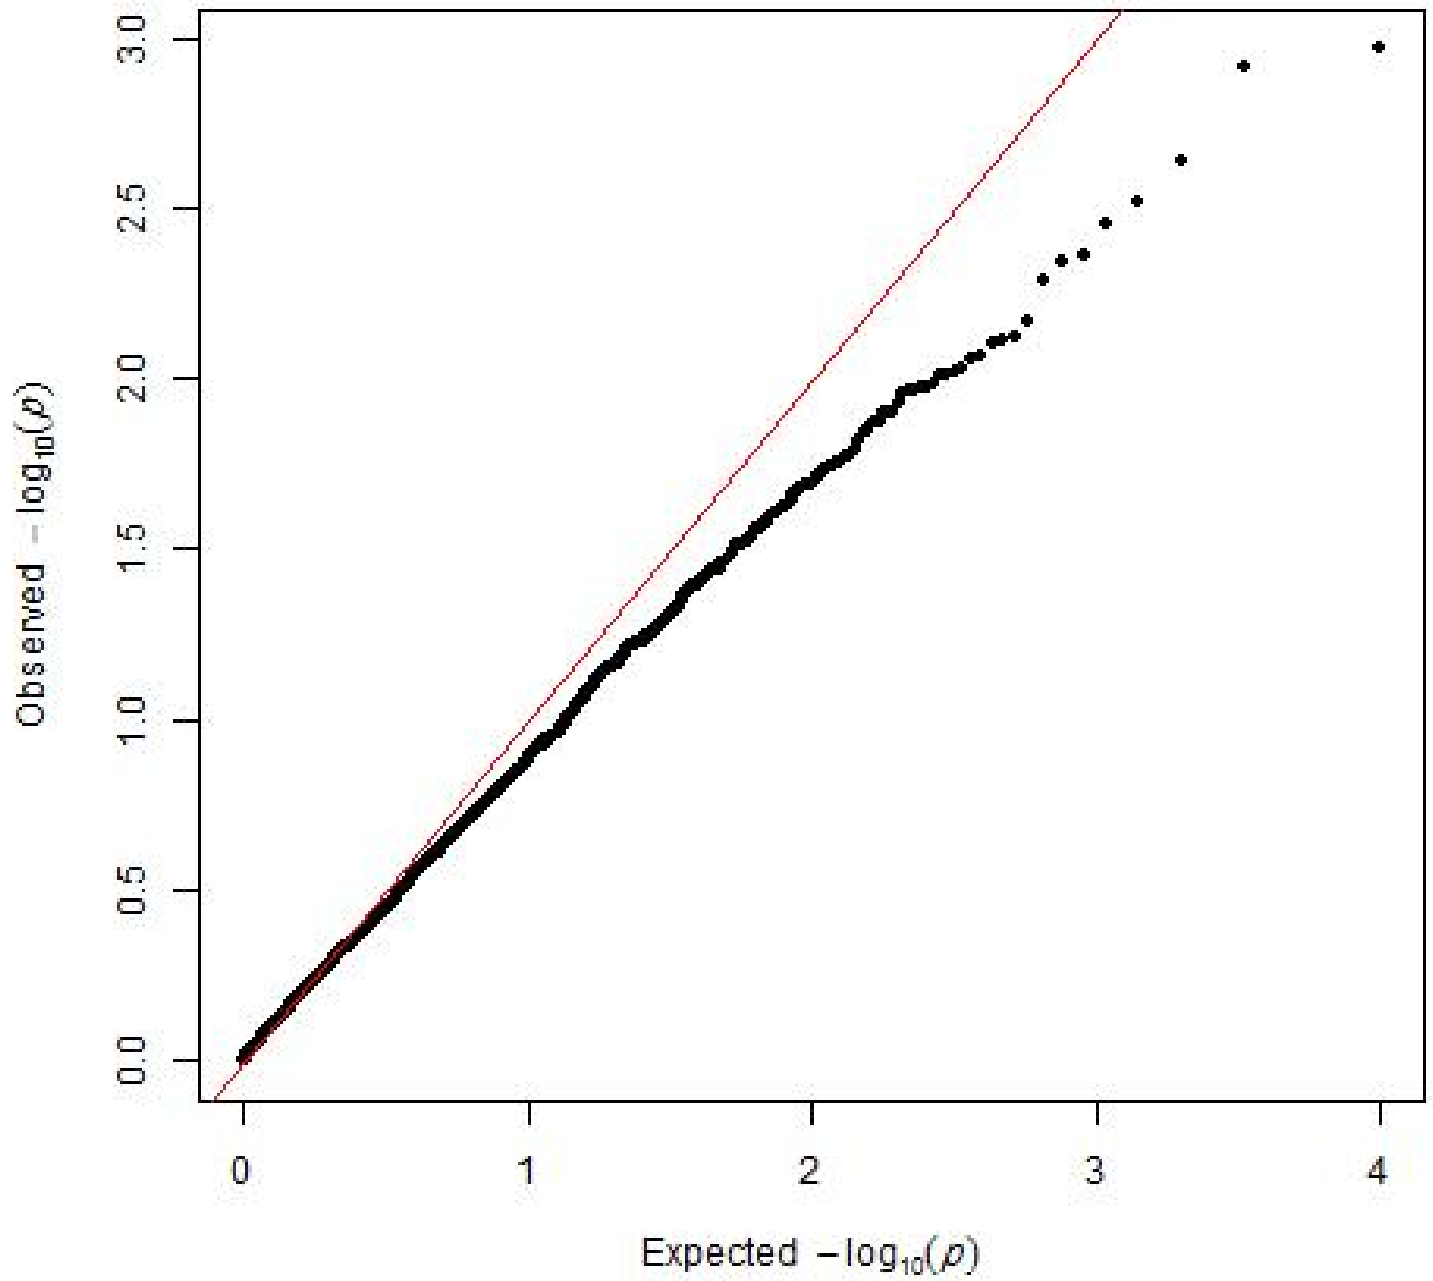



PL

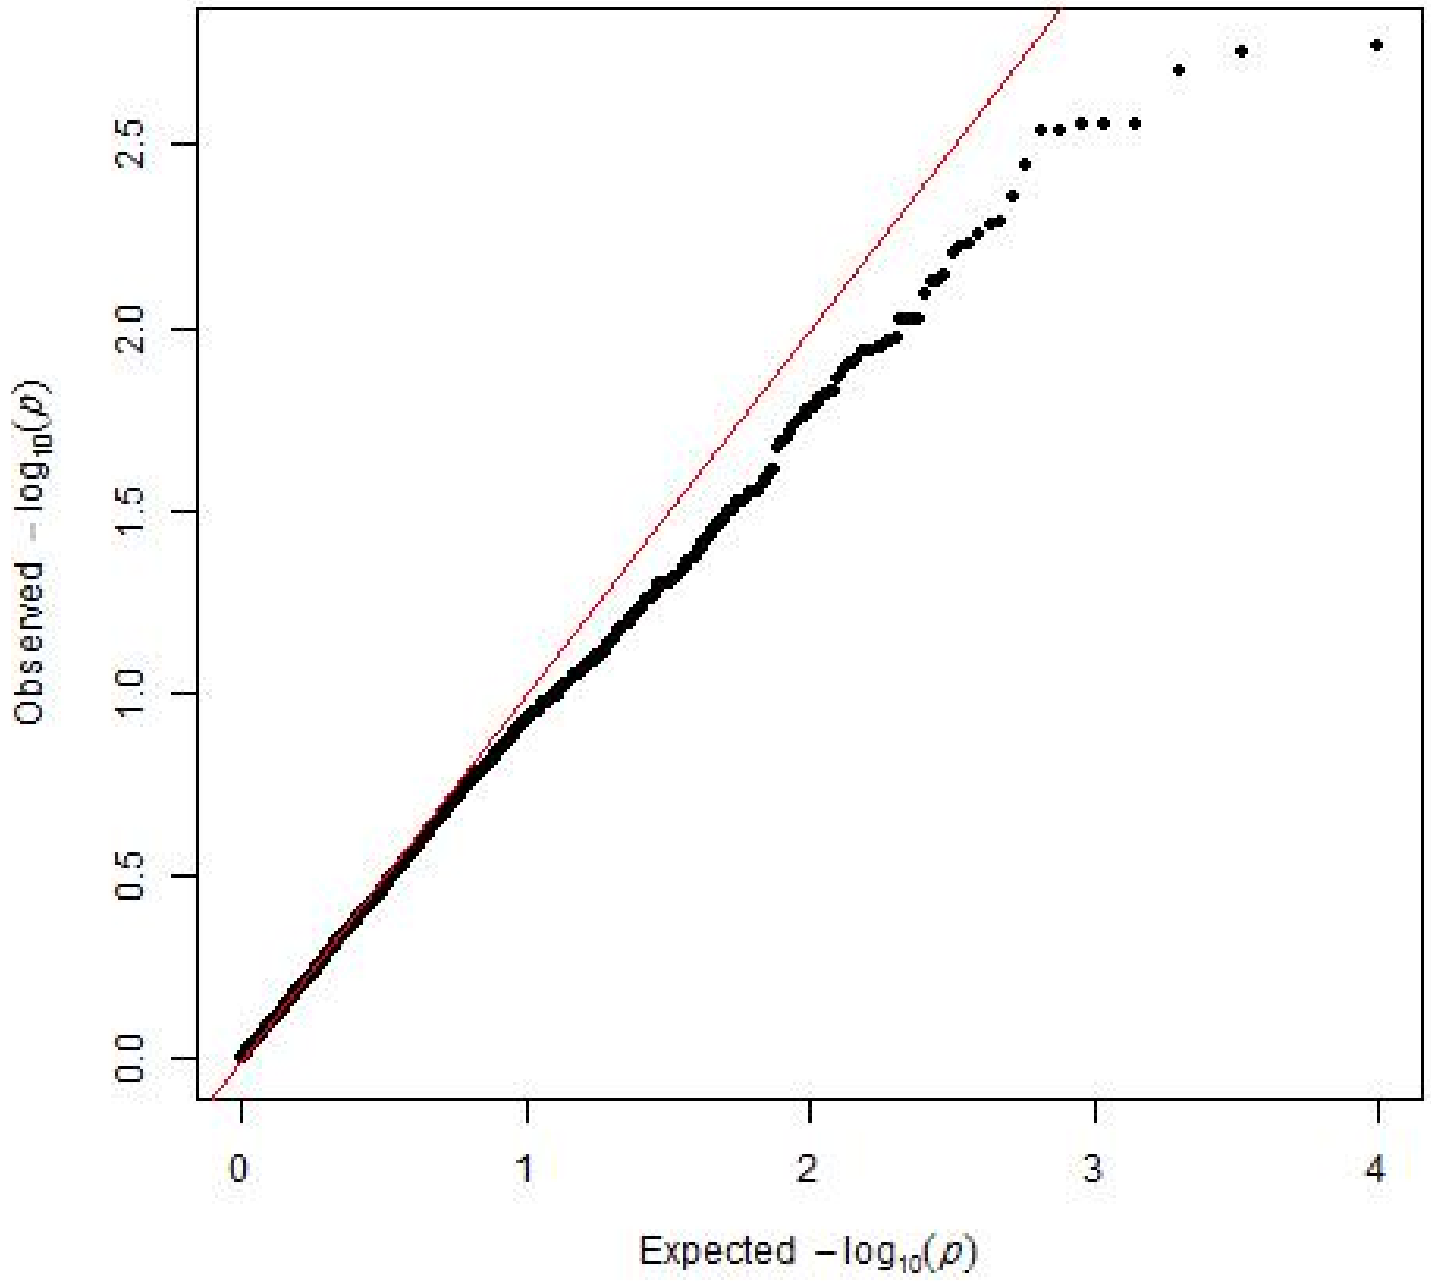

SL

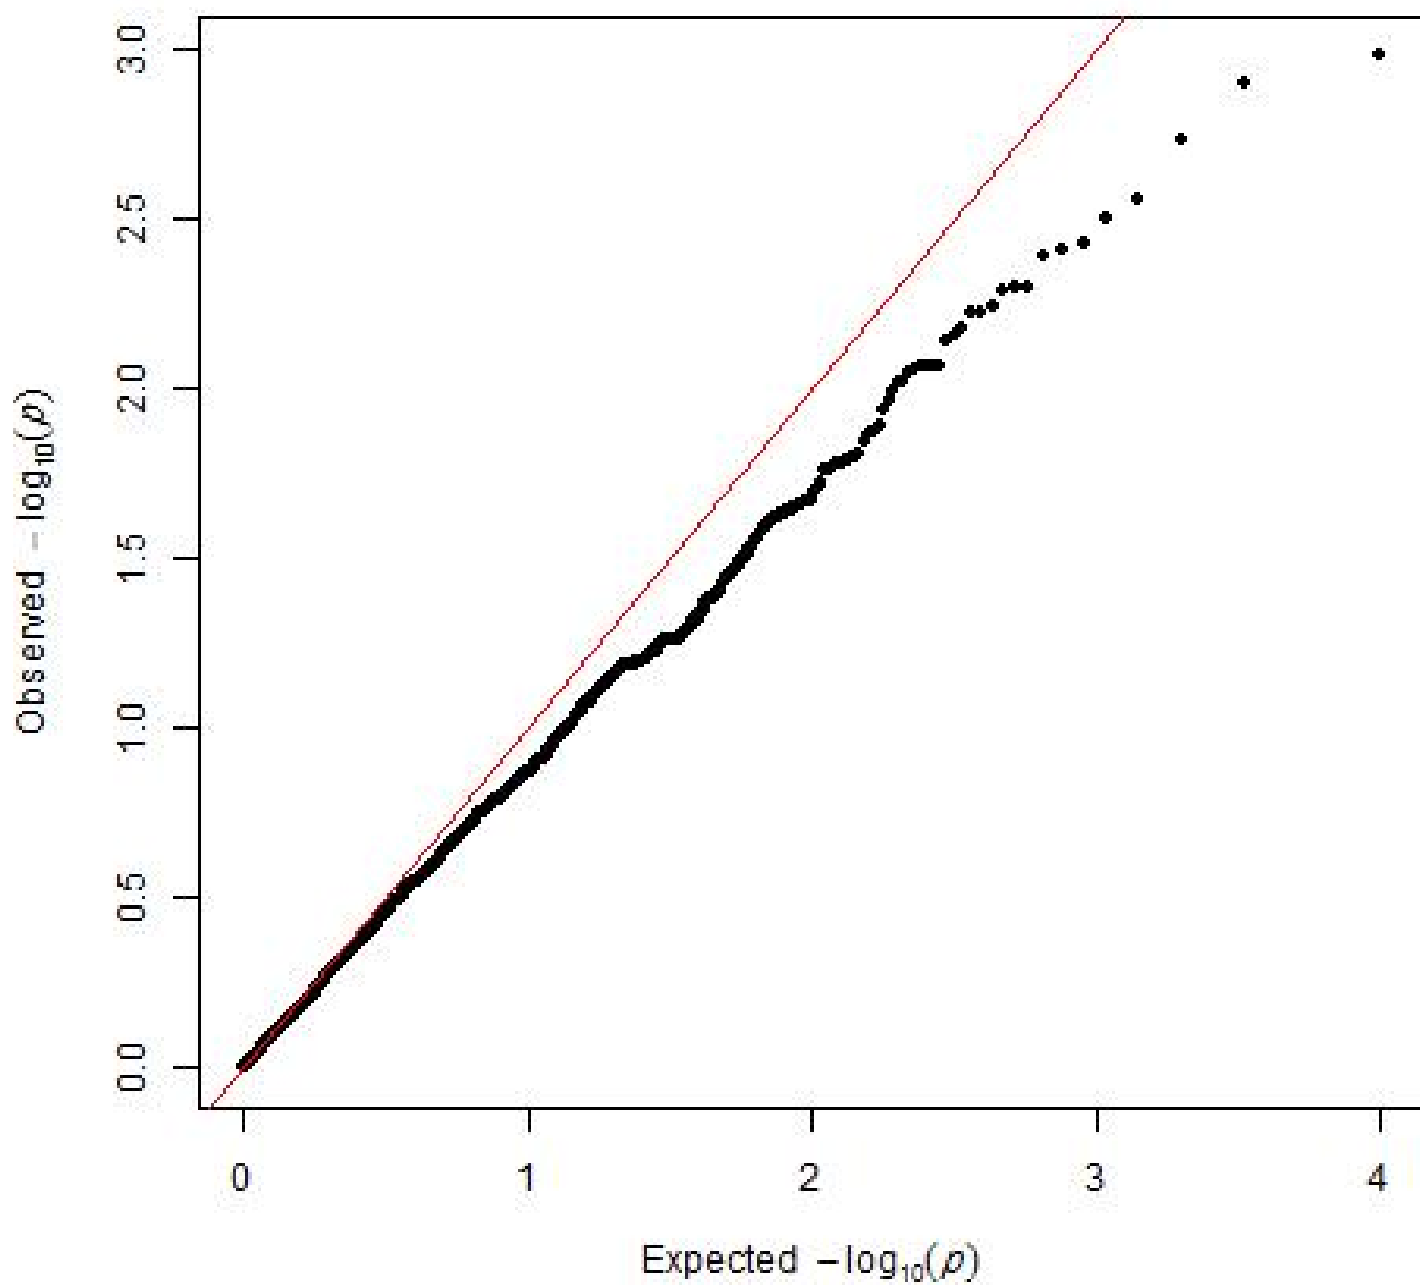

StY

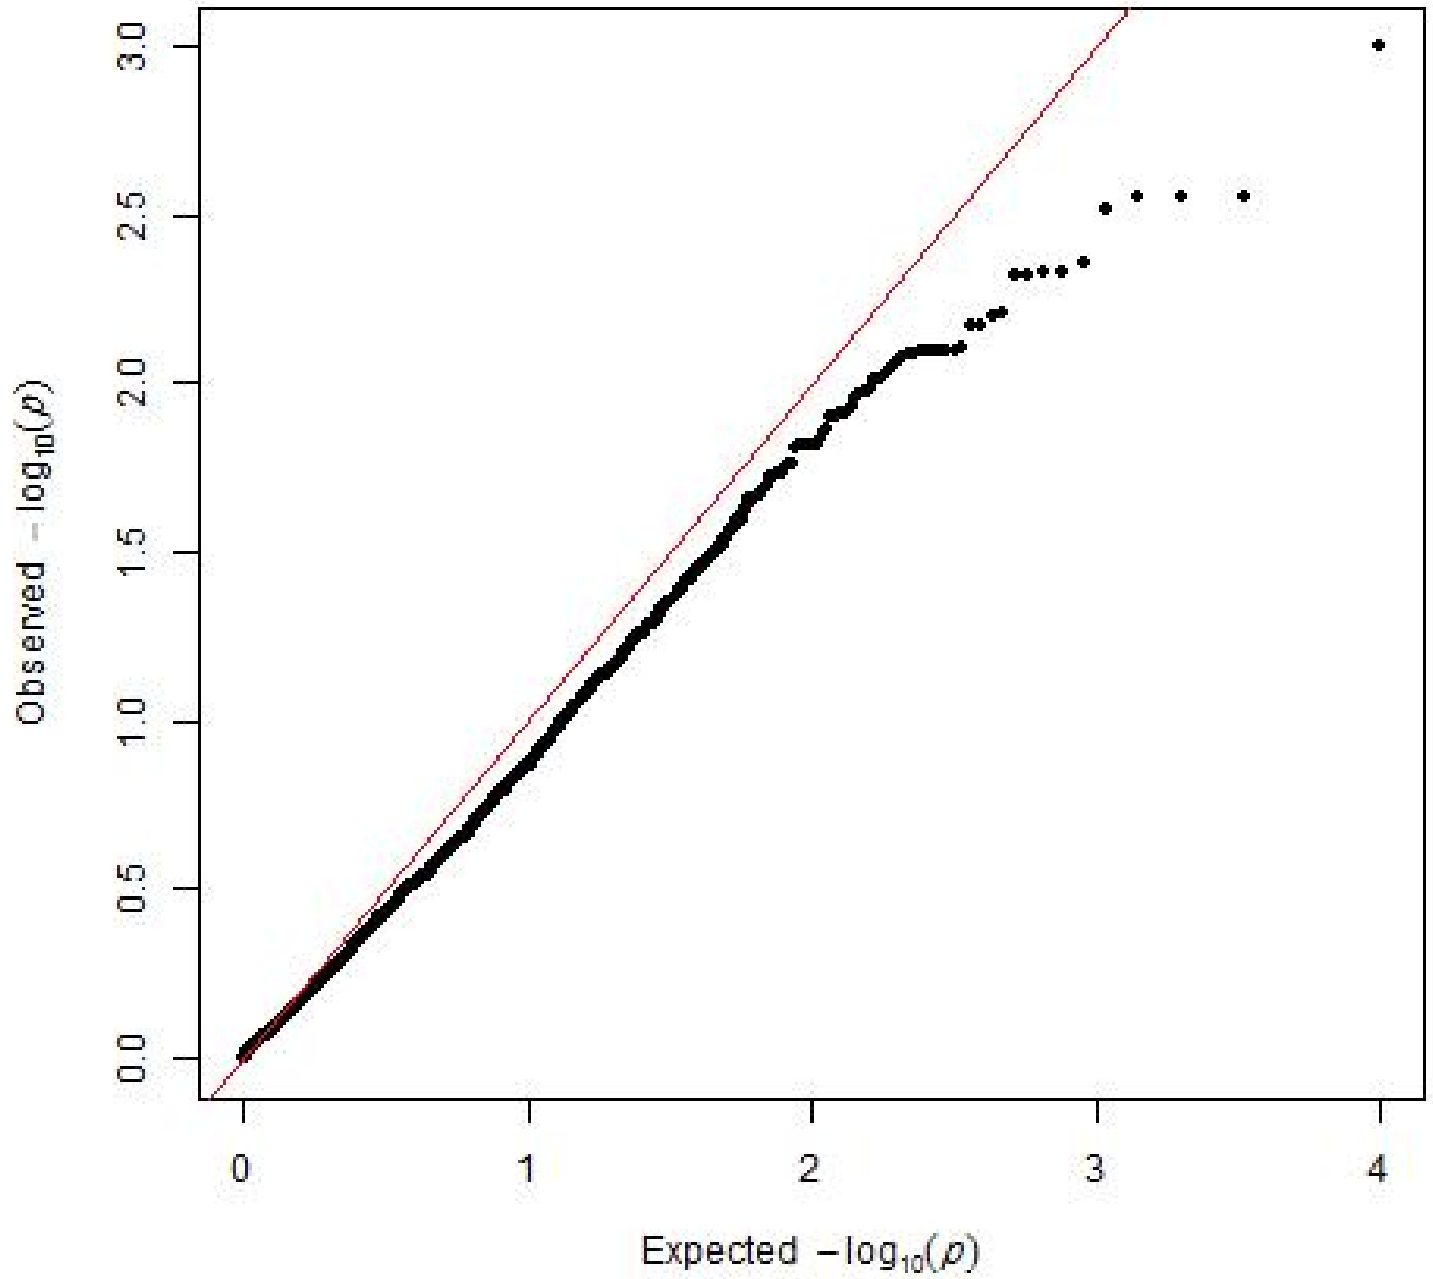

SW

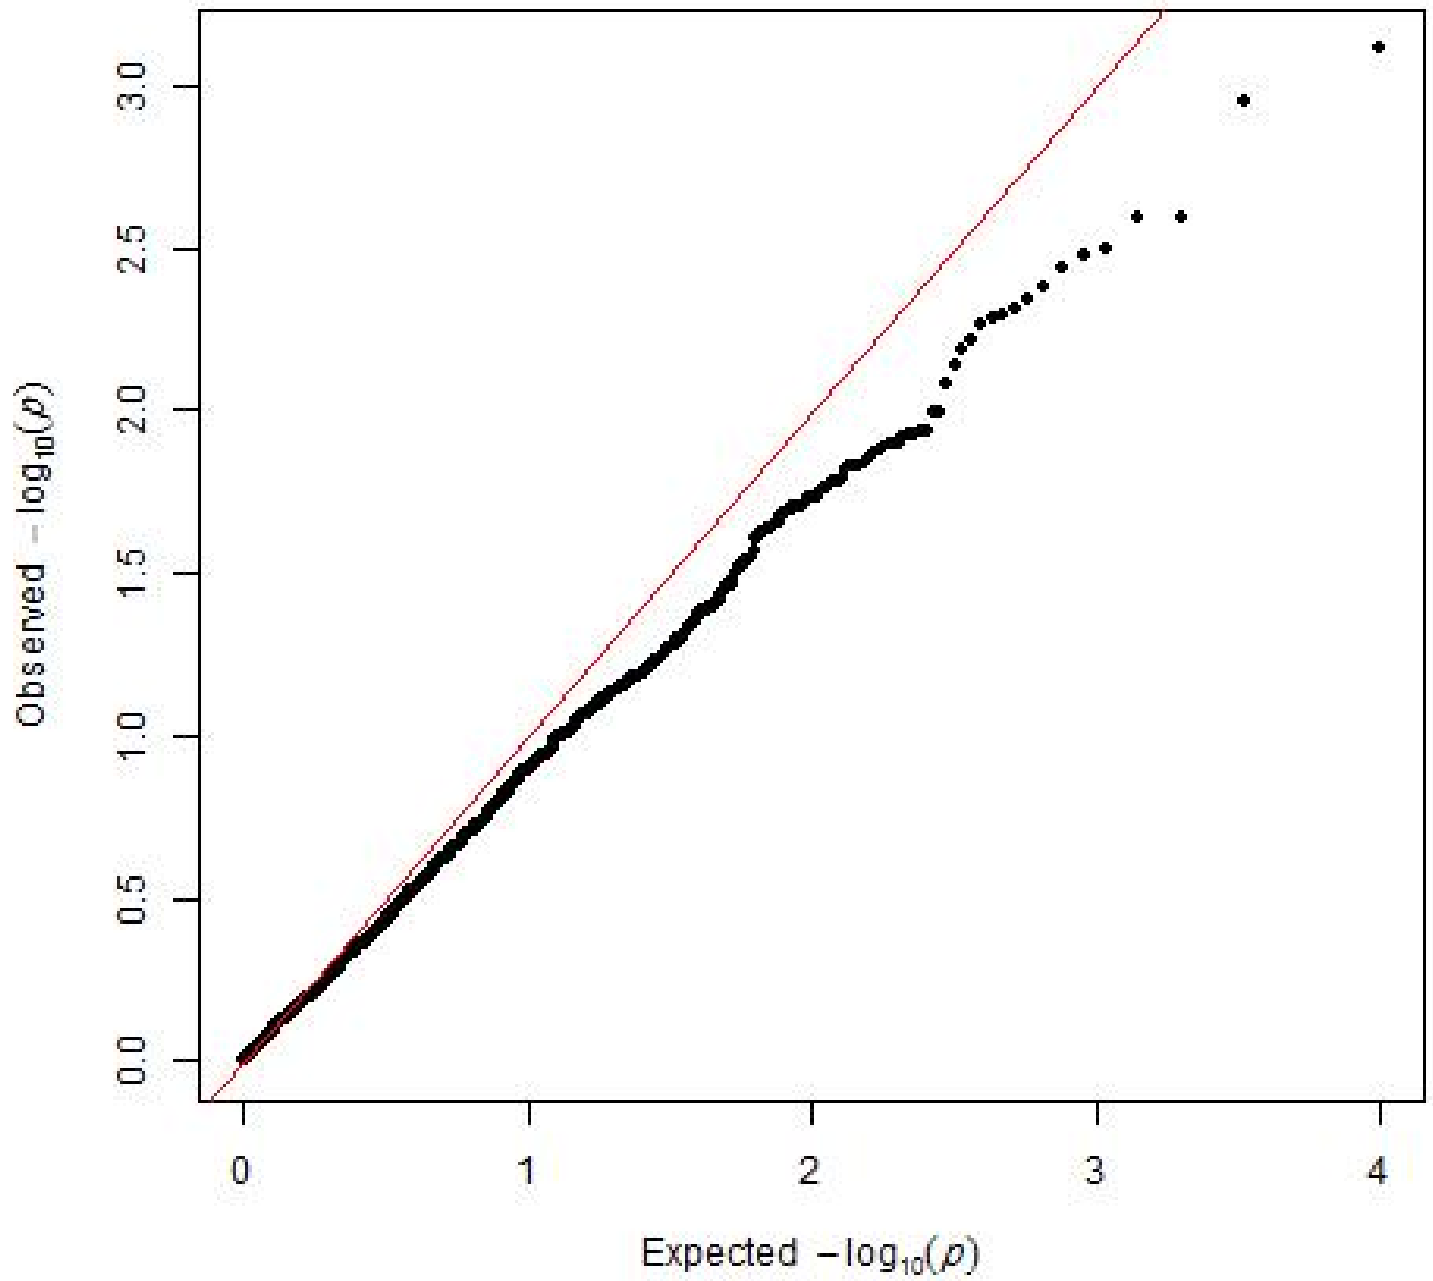

TKWT

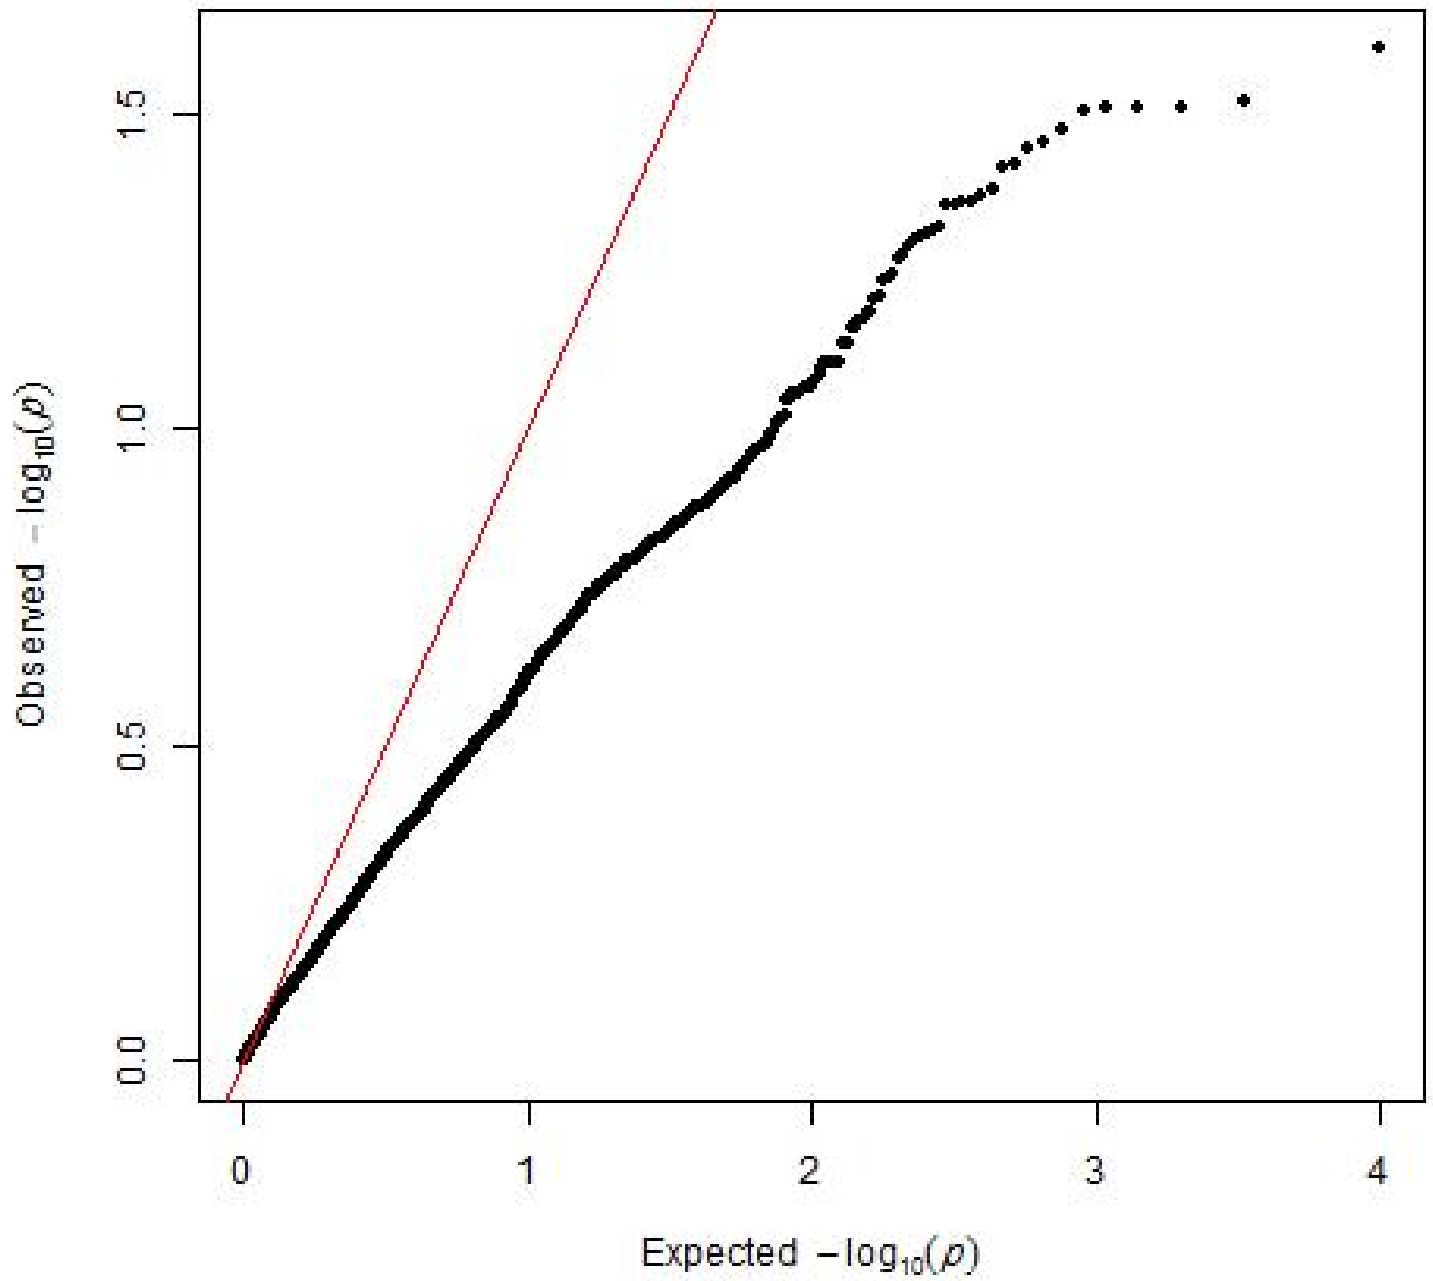

**MLM-Q**

AL

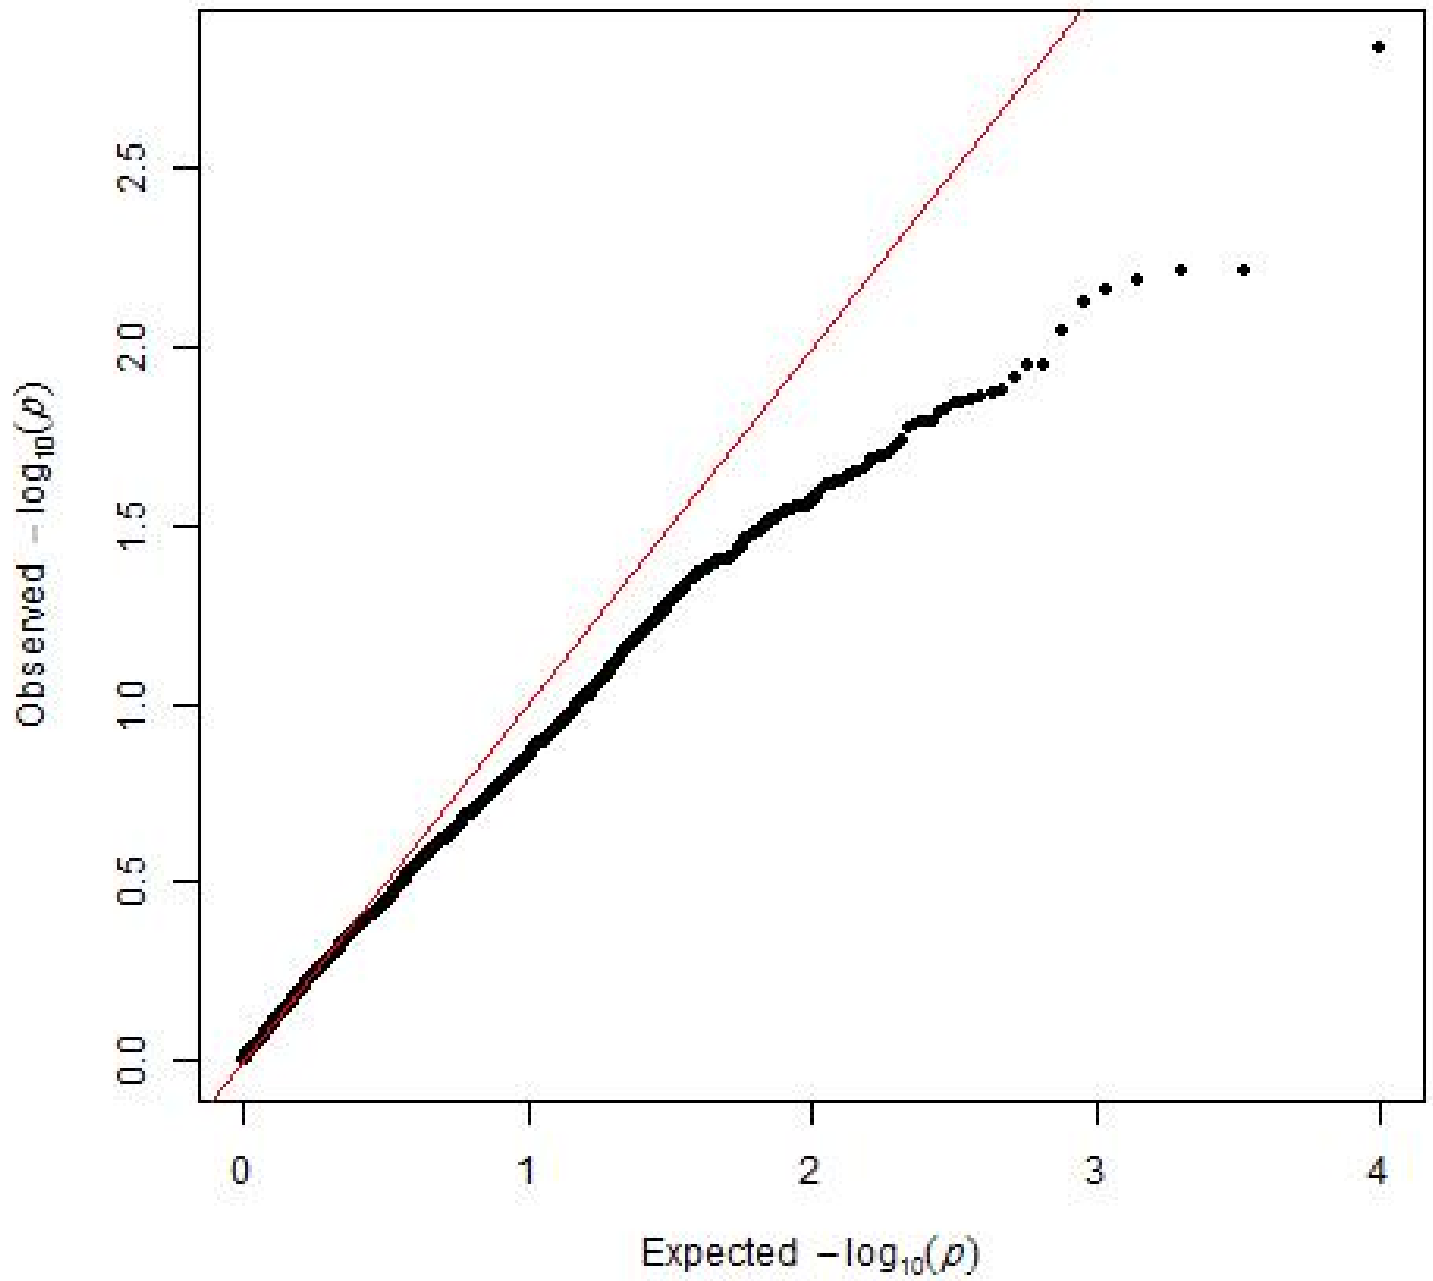

BY

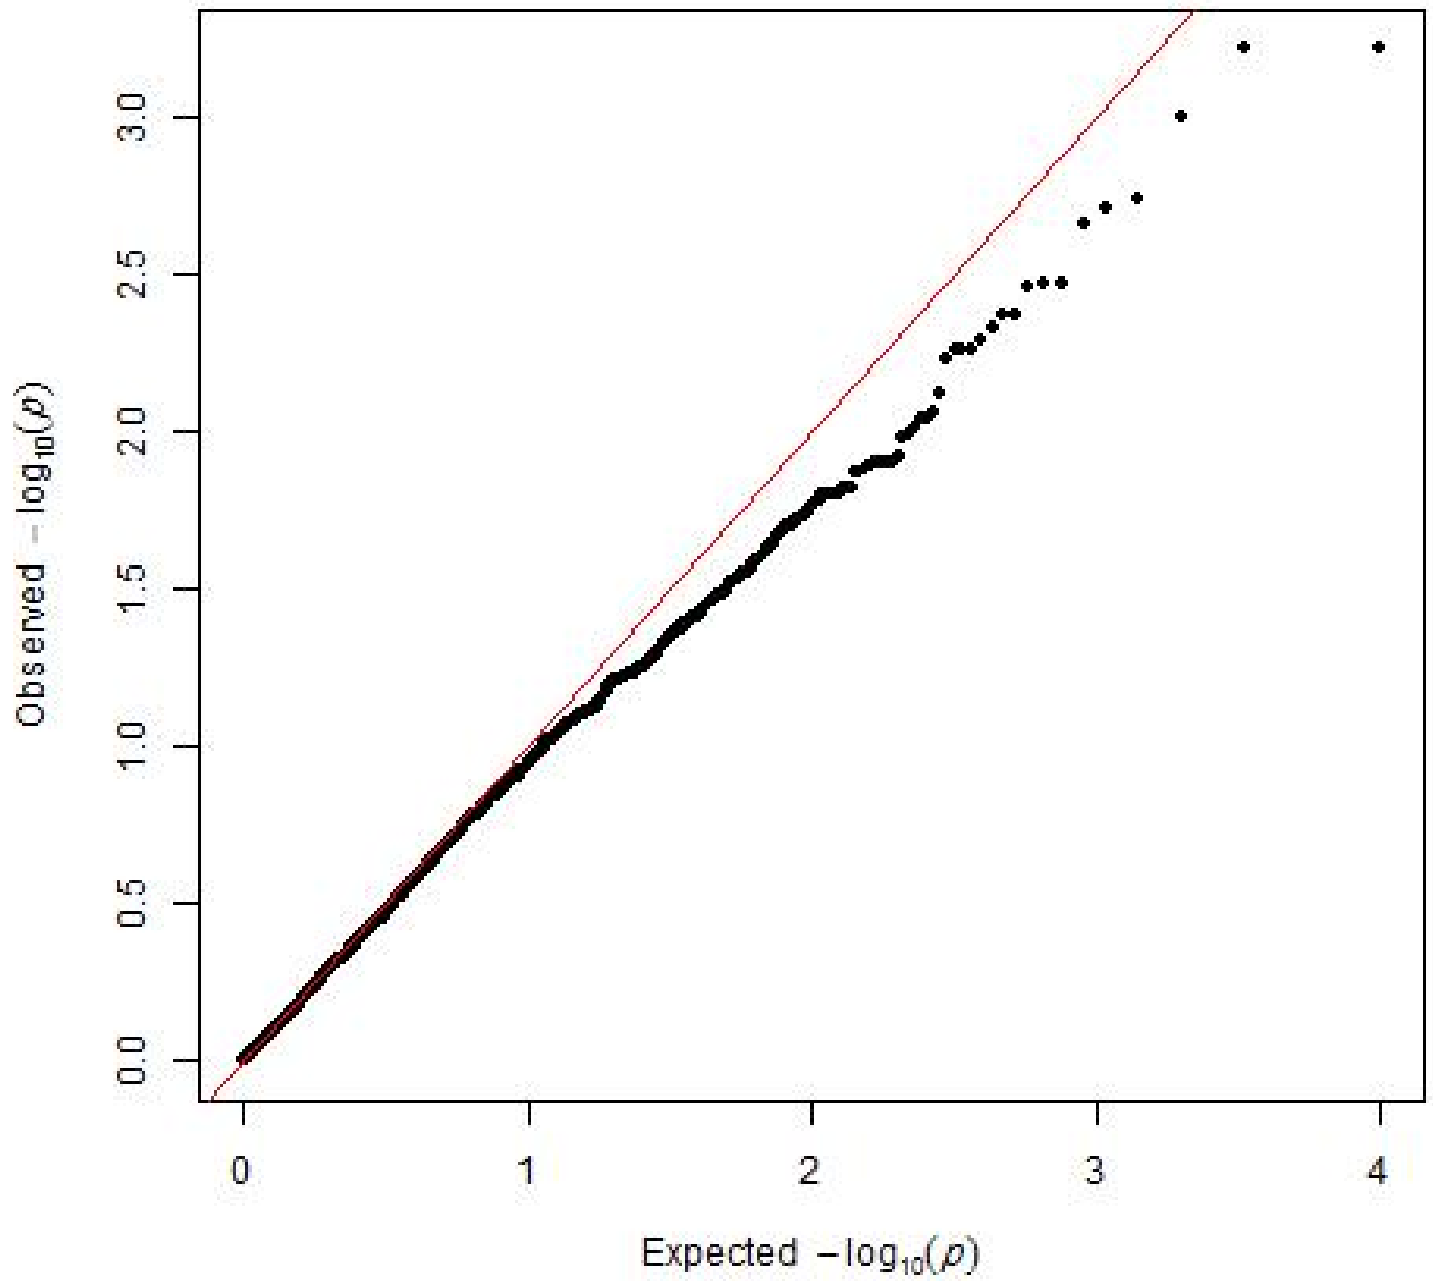



GY

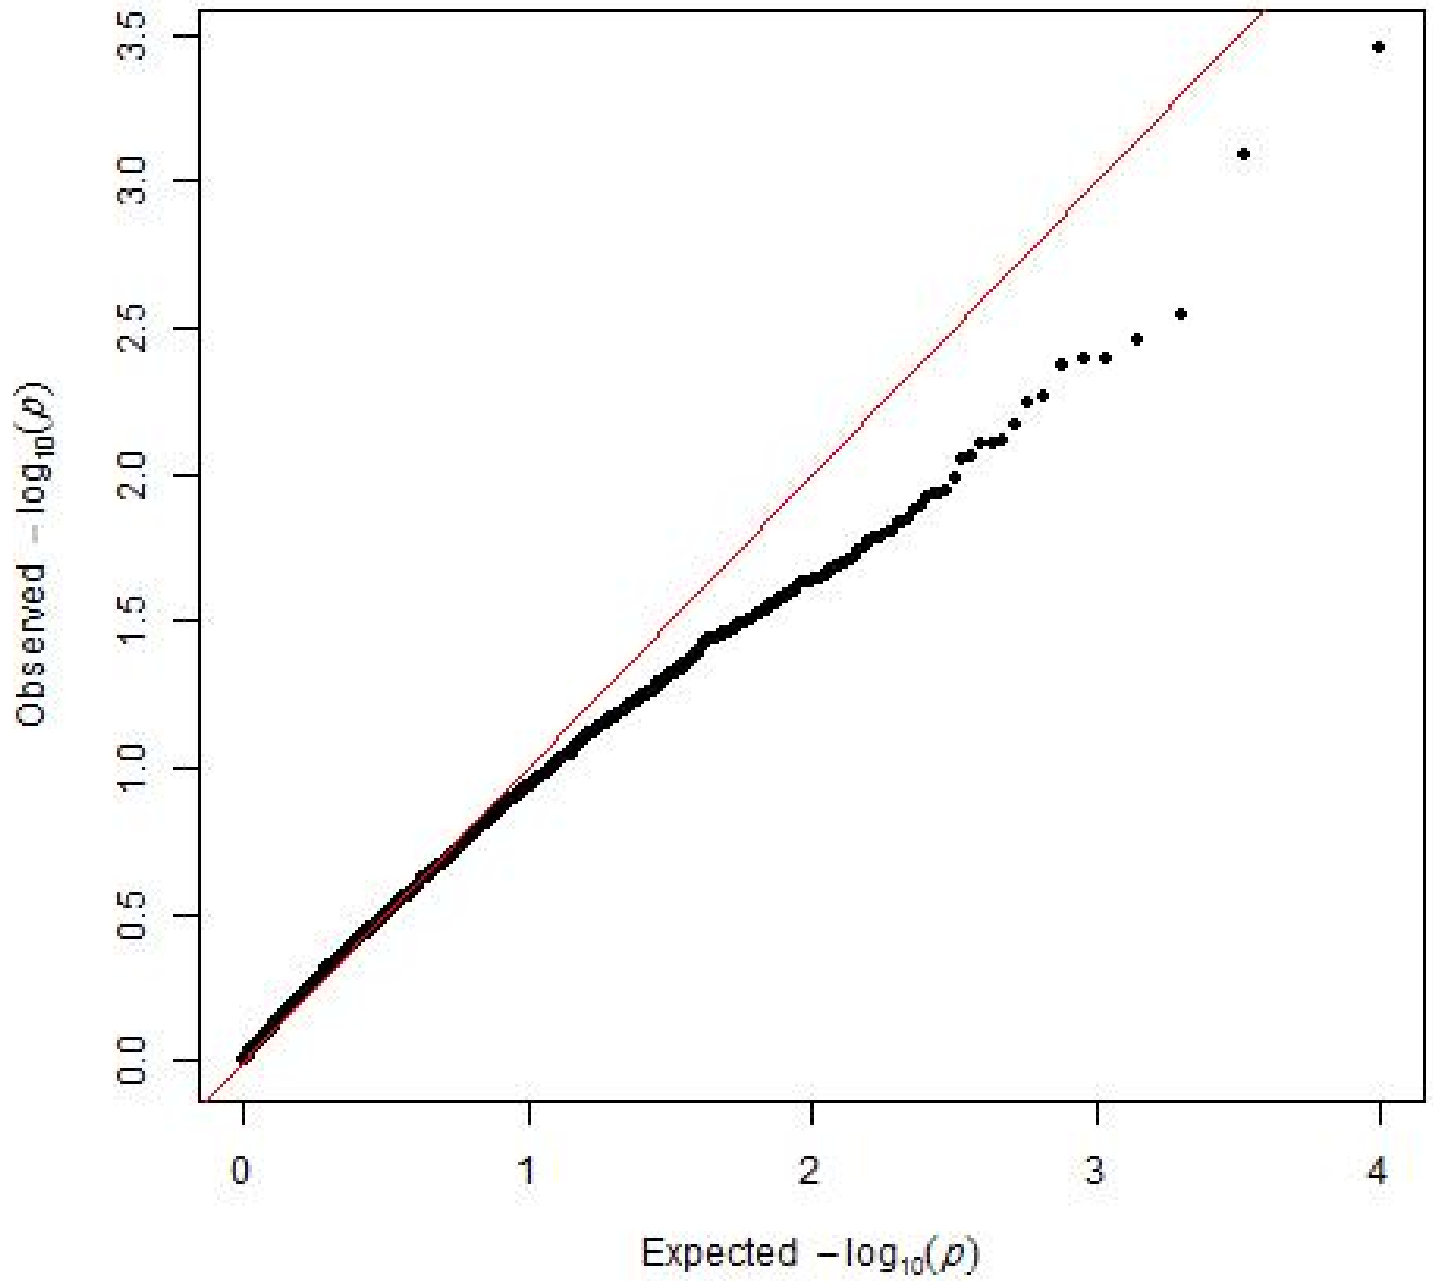

HI

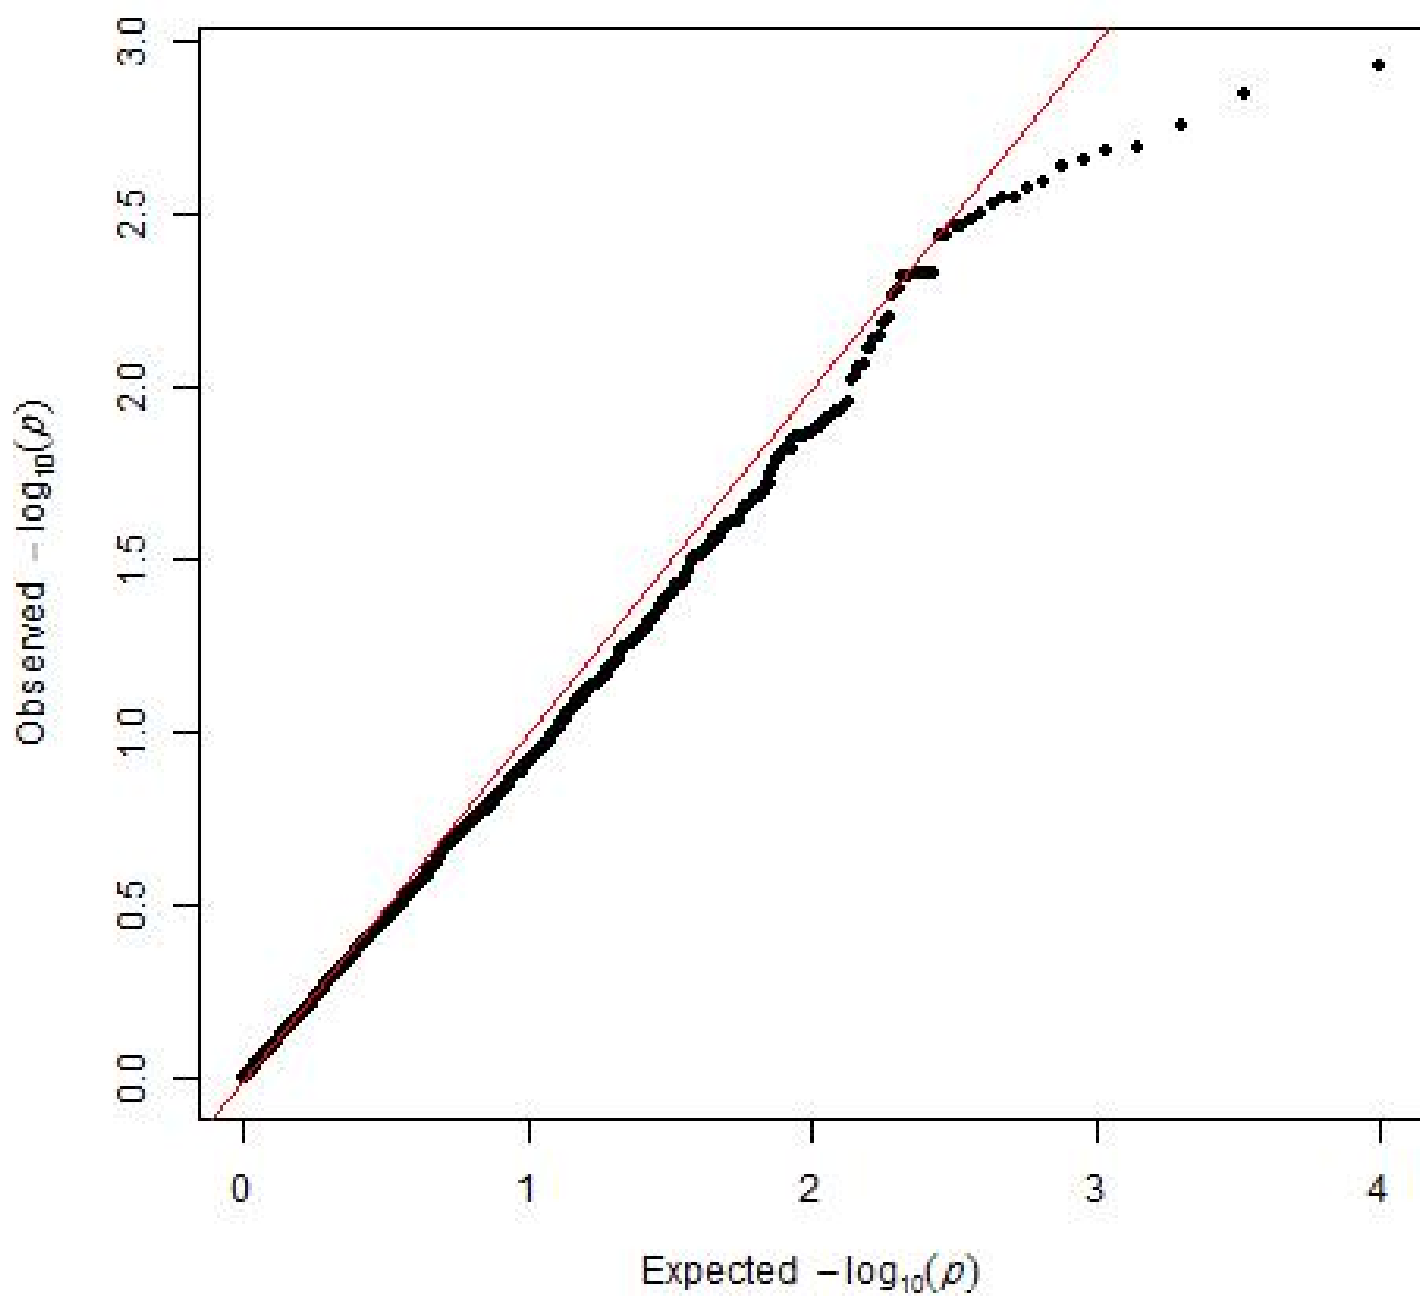

### K-S

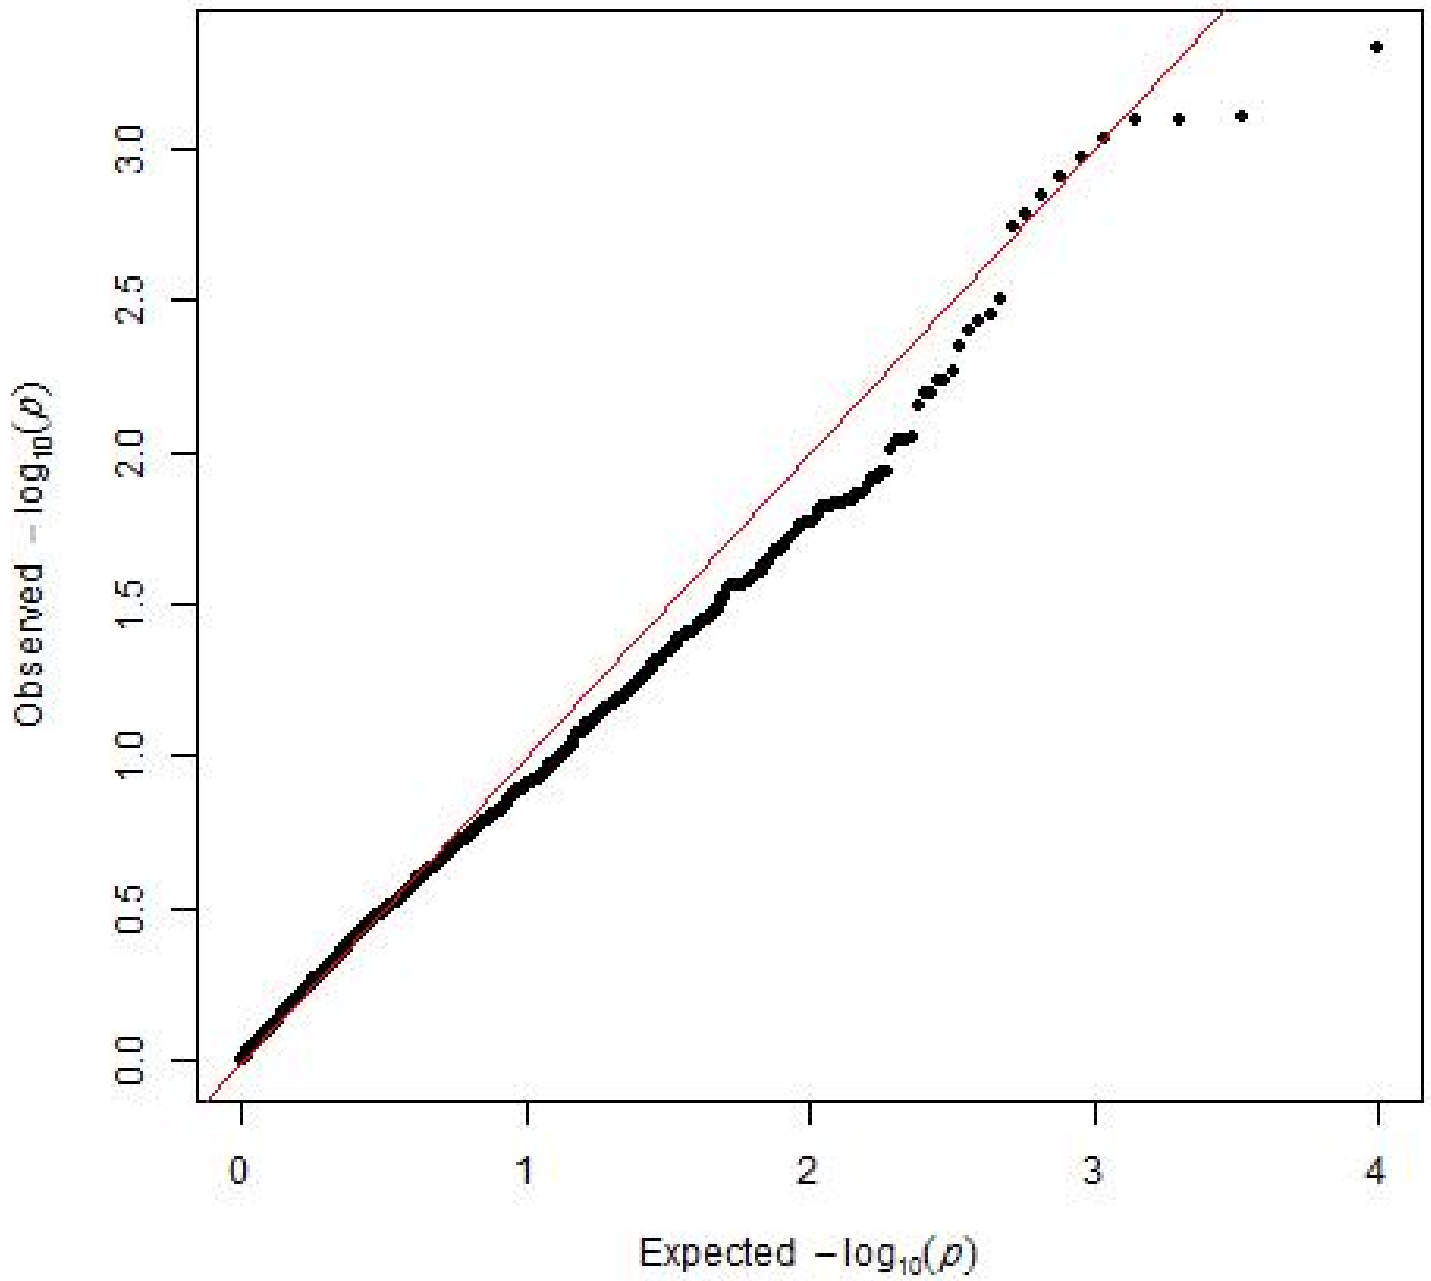

# PEX

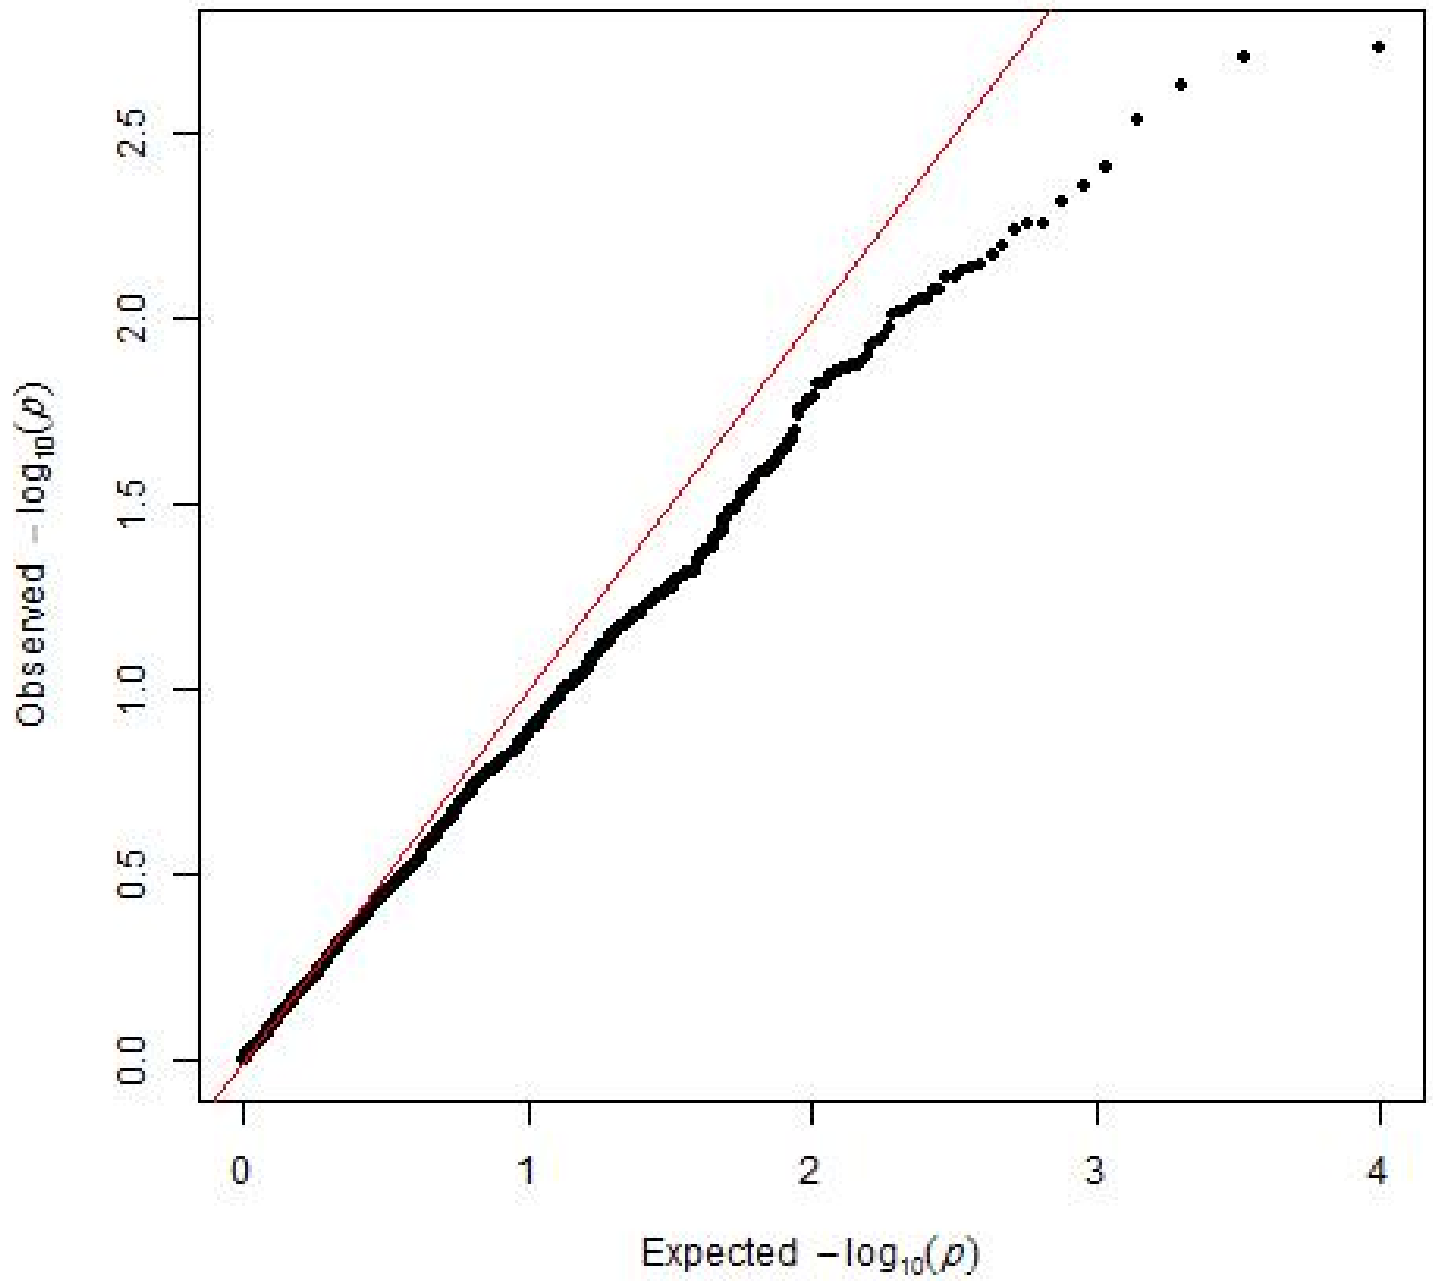

PH

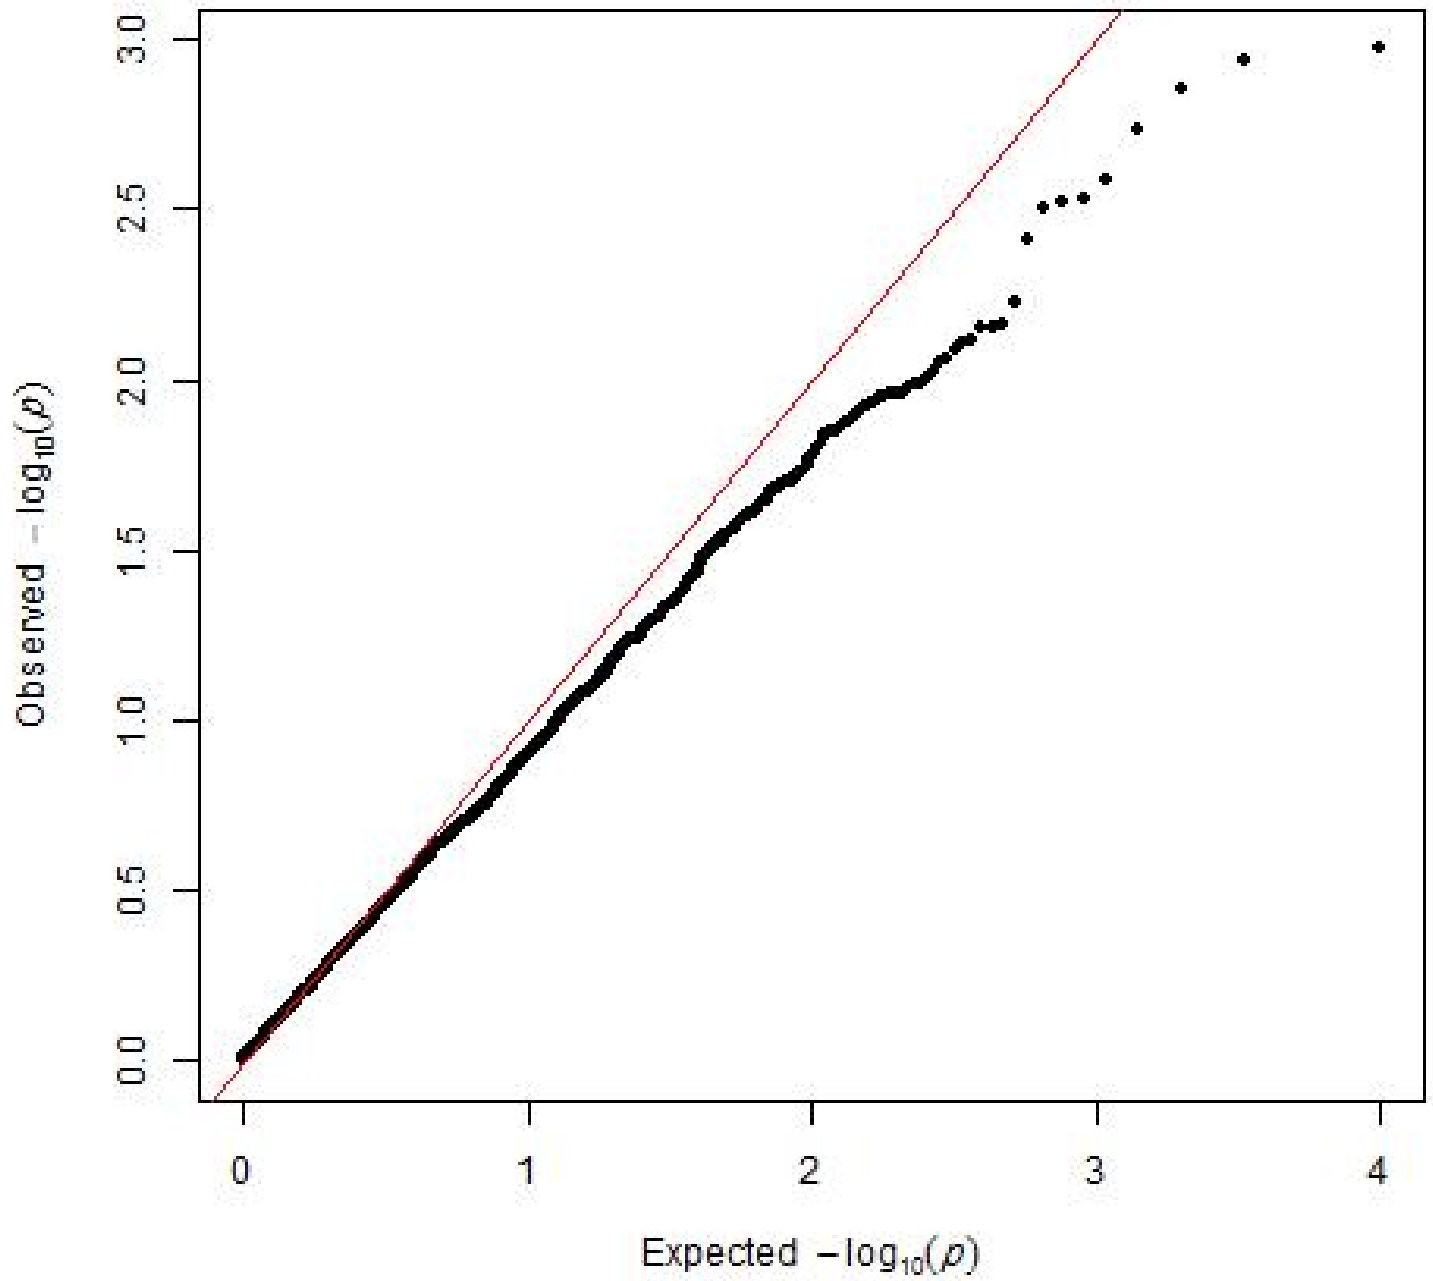

PL

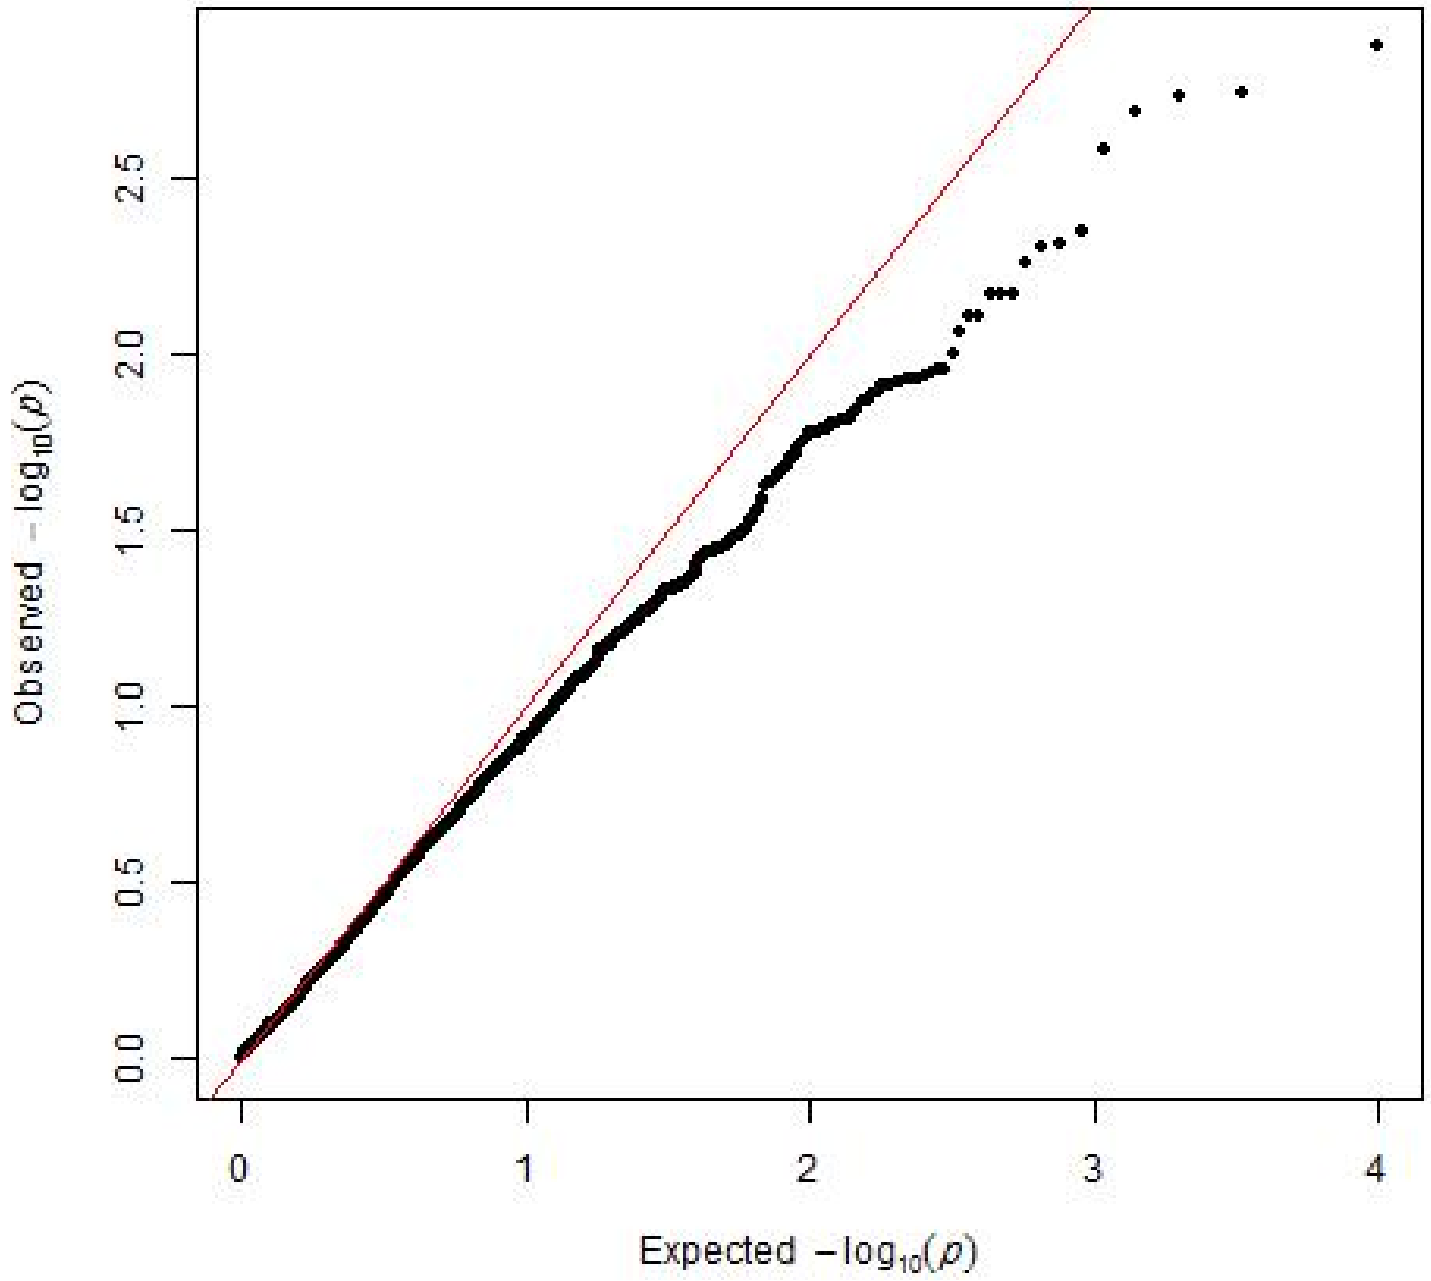

SL

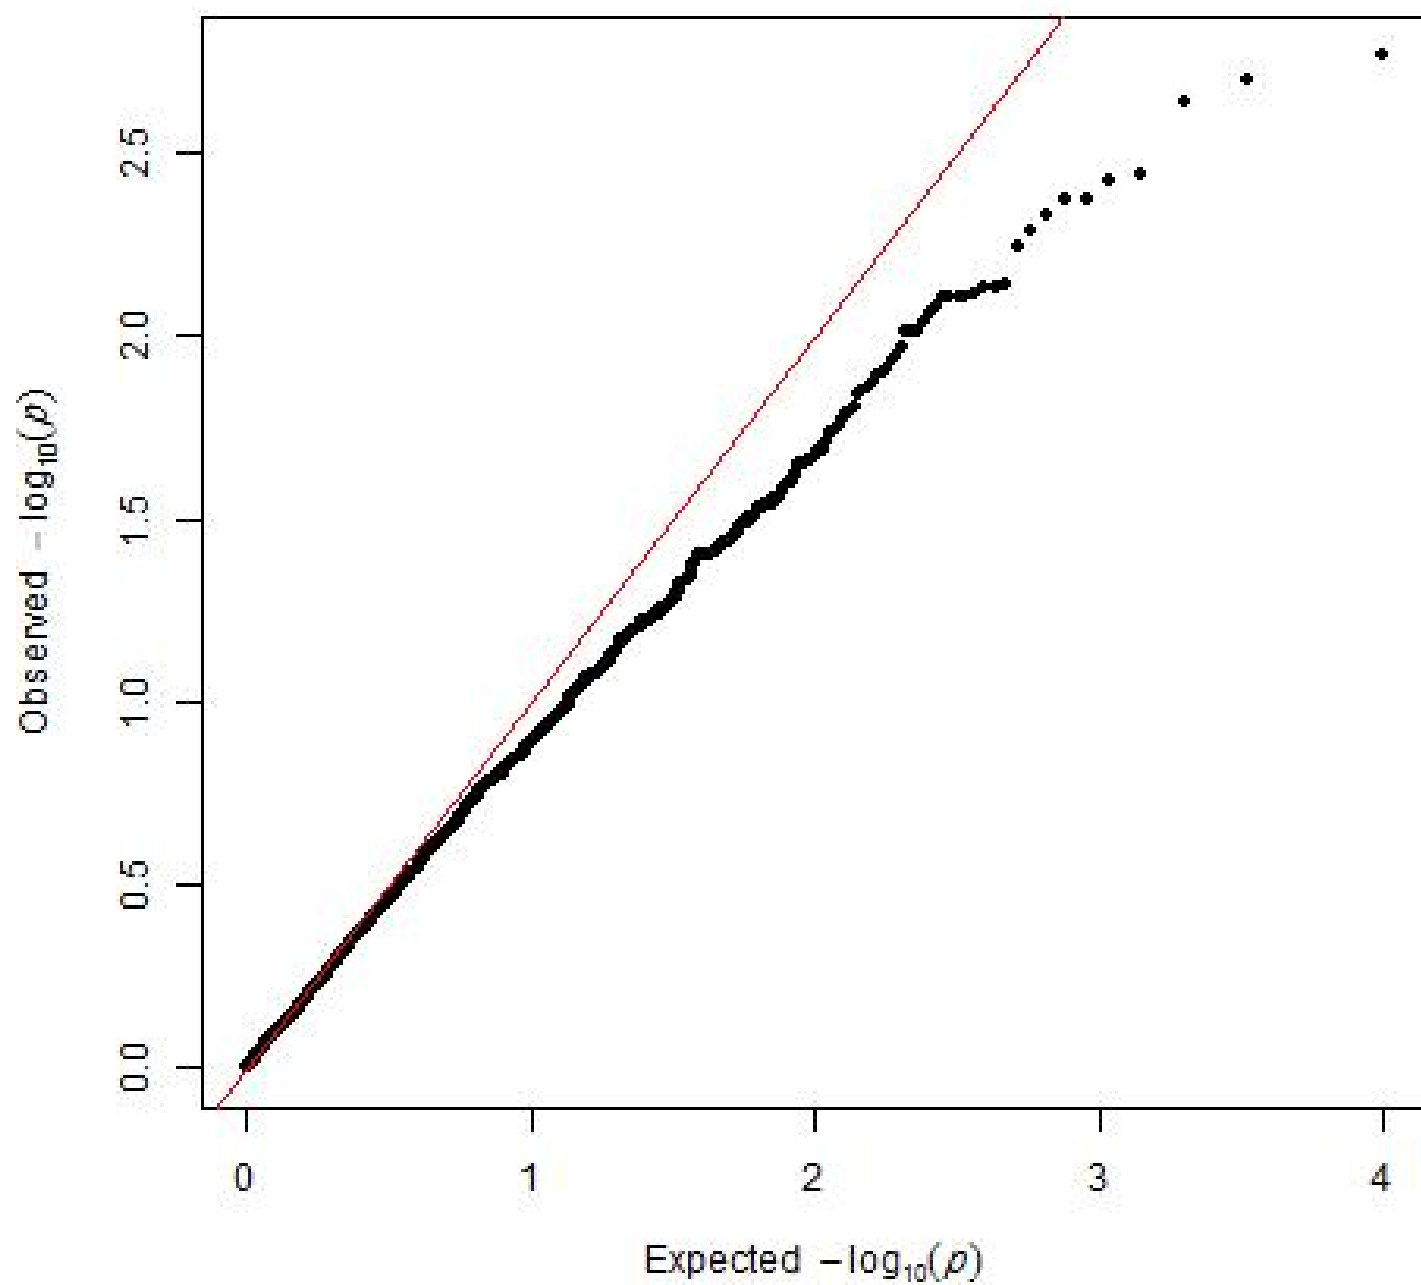

StY

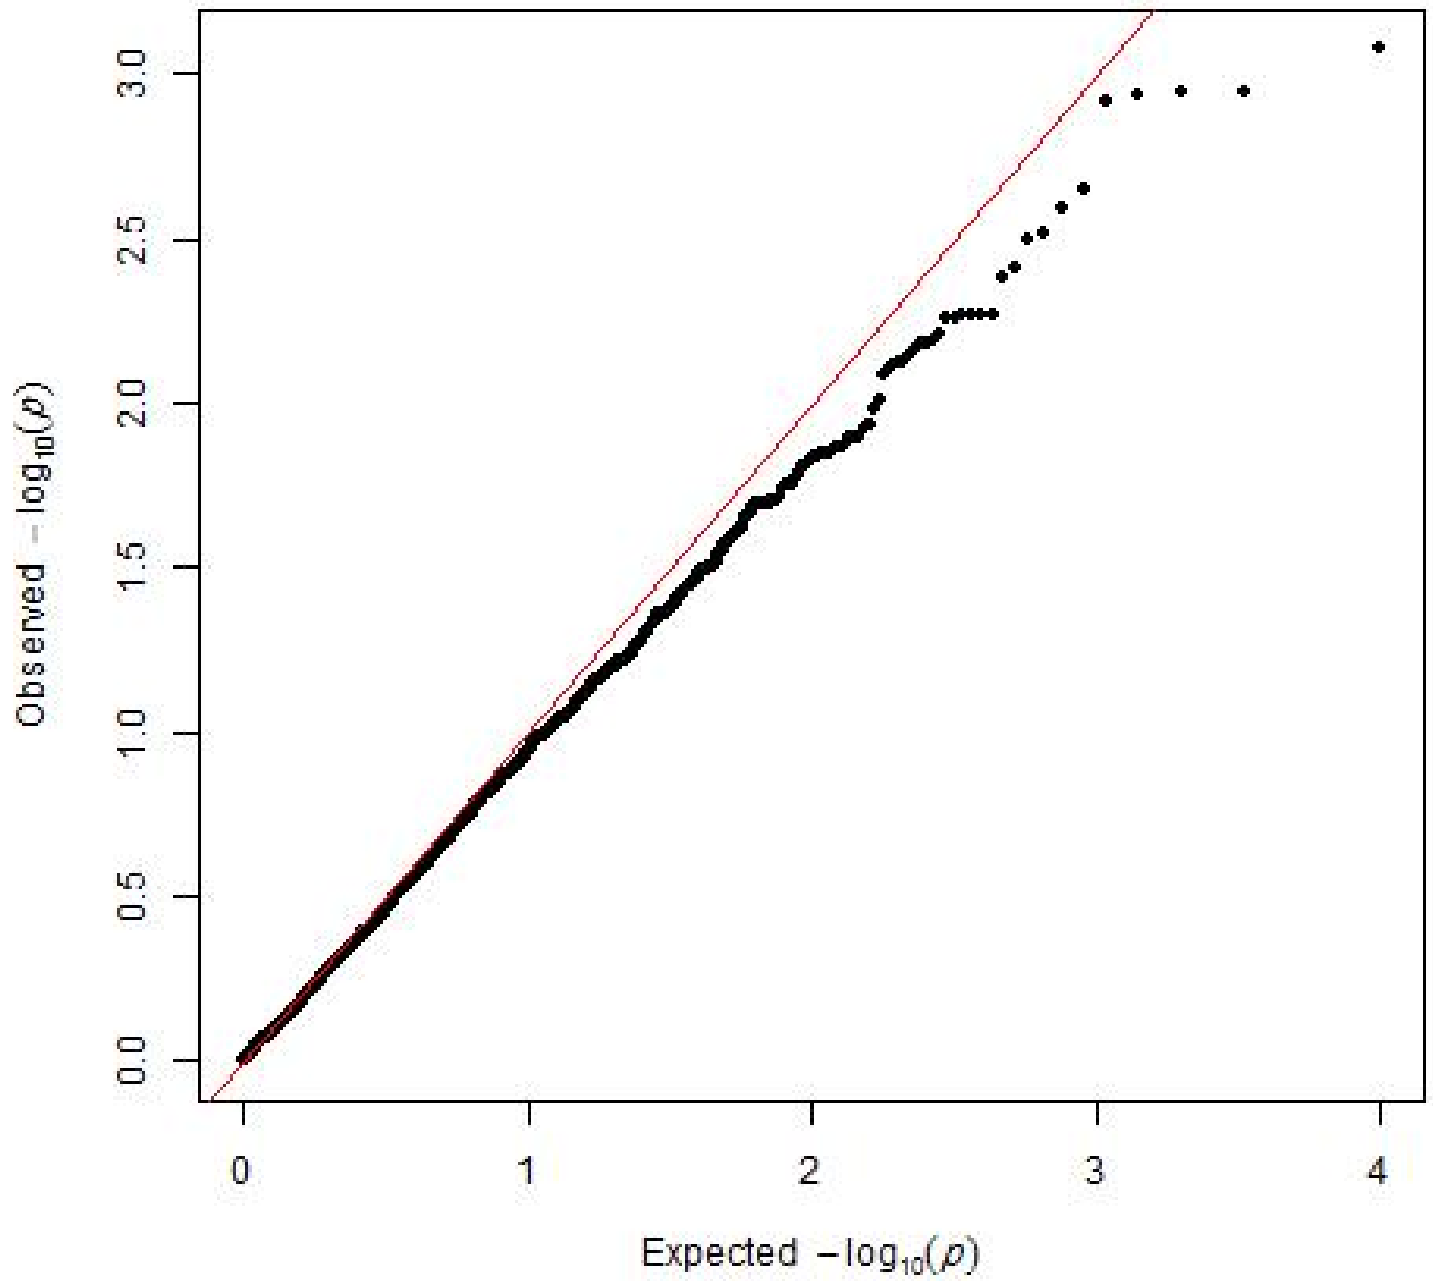



SW

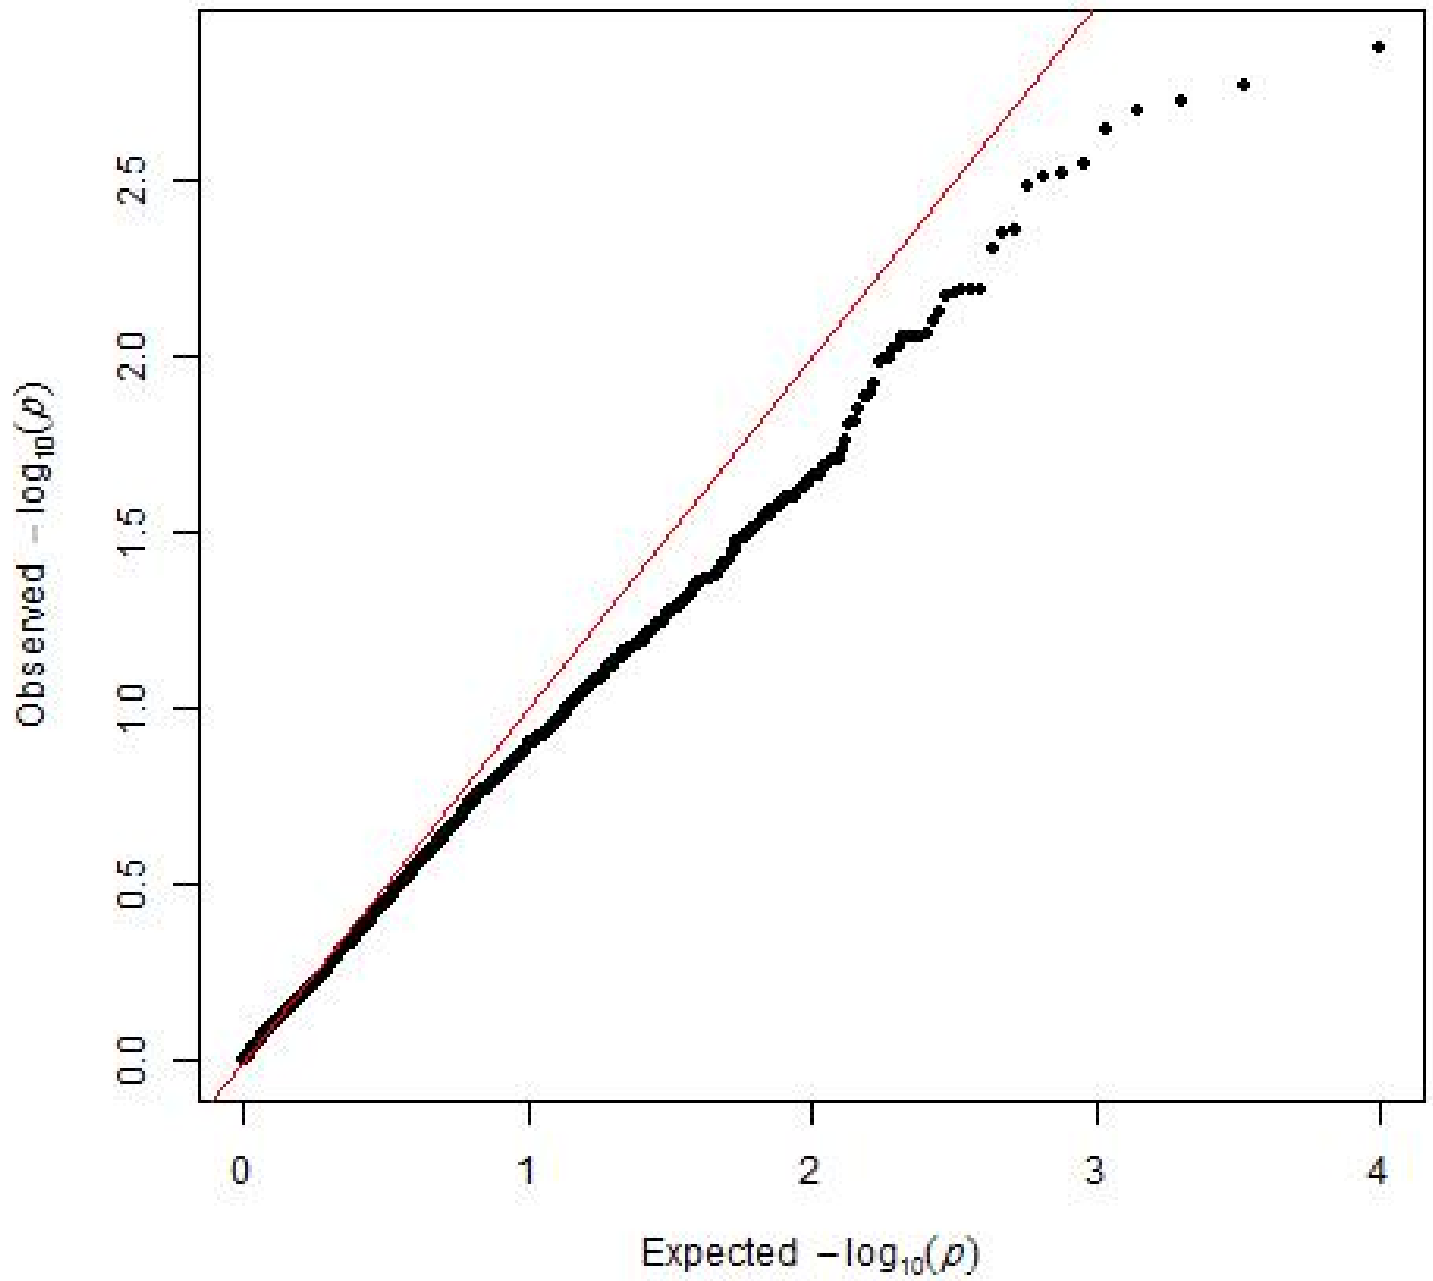

TKWT

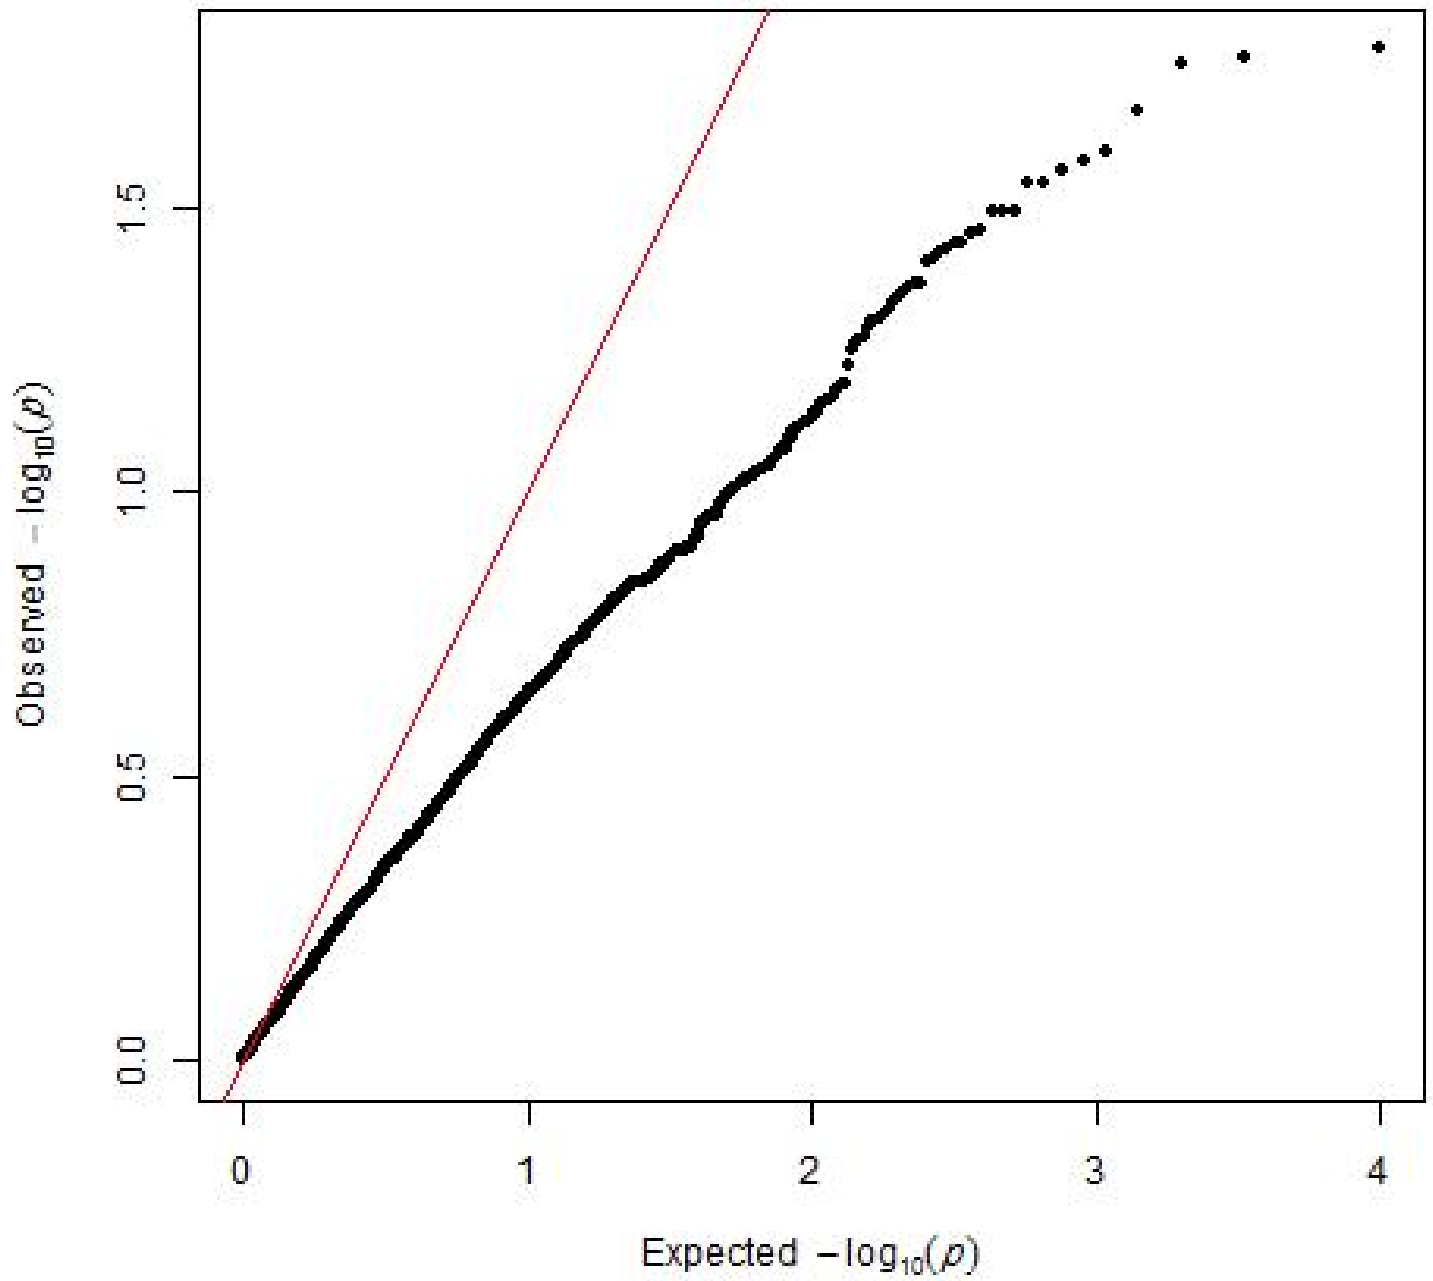

Supplement: 12870_2017_1140_MOESM10_ESM.pdf [file 12870_2017_1140_MOESM10_ESM.pdf]
